# Supplementary material
Source: PubMed Central journal article supplement (PMC4422053)
Supplement: NIHMS677065-supplement-Supplement1.pdf [file NIHMS677065-supplement-Supplement1.pdf]

## Supplementary Appendix

This appendix has been provided by the authors to give readers additional information about their work.

Supplement to: The Diabetic Retinopathy Clinical Research Network. Aflibercept, bevacizumab, or ranibizumab for diabetic macular edema. *N Engl J Med* 2015;372:1193-203. DOI: 10.1056/NEJMoa1414264

## Contents

|                                                                                                                                     |    |
|-------------------------------------------------------------------------------------------------------------------------------------|----|
| Acknowledgements .....                                                                                                              | 2  |
| Figure S1A. Diabetic Macular Edema Treatment with anti-VEGF during Follow-up .....                                                  | 7  |
| Figure S1B. Initiating Focal/Grid Photocoagulation for Diabetic Macular Edema Treatment .....                                       | 8  |
| Figure S1C. Re-Treatment with Focal/Grid Photocoagulation during Follow-up for Diabetic Macular Edema.....                          | 9  |
| Figure S2. Completion of Follow-up for Study Eyes .....                                                                             | 10 |
| Figure S3. Change in Visual Acuity from Baseline to 1 Year by Treatment Group<br>According to Baseline Visual Acuity.....           | 11 |
| Figure S4. Change in Visual Acuity Score from Baseline to Follow-up Visits.....                                                     | 12 |
| Table S1. Eligibility Criteria .....                                                                                                | 13 |
| Table S2. Study Bevacizumab Potency Testing Process and Results.....                                                                | 15 |
| Table S3. Visual Acuity at 1 Year: Sensitivity Analysis .....                                                                       | 16 |
| Table S4. Visual Acuity Outcomes Overall.....                                                                                       | 17 |
| Table S5. Optical Coherence Tomography Central Subfield Thickness Outcomes Overall .....                                            | 19 |
| Table S6. Baseline Characteristics .....                                                                                            | 21 |
| Table S7. Treatment for Diabetic Macular Edema Prior to the 1 Year Visit .....                                                      | 25 |
| Table S8. Change in Visual Acuity Letter Score from Baseline to 1 Year:<br>Additional Pre-Planned Subgroup Analyses .....           | 27 |
| Table S9. Change in Retinal Volume from Baseline to 1 Year .....                                                                    | 28 |
| Table S10. Systemic Adverse Events through 1 Year: Stratified by Whether<br>Bilateral Study Drug was Received Prior to 1 Year ..... | 29 |
| Table S11. Post Hoc Analysis: Events by Medical Dictionary for Regulatory<br>Activities System Organ Class Through 1 Year .....     | 31 |
| Table S12. Post Hoc Analysis: Cardiovascular Events through 1 Year .....                                                            | 32 |
| Table S13. All Ocular Adverse Events Occurring in the Study Eye through 1 Year.....                                                 | 34 |
| Table S14. All Ocular Adverse Events Occurring in the Non-Study Eye from the<br>First Non-Study Eye Injection through 1 Year .....  | 38 |
| Table S15. All Systemic Adverse Events Occurring Through 1 Year .....                                                               | 41 |
| References .....                                                                                                                    | 52 |

## Acknowledgements

### Diabetic Retinopathy Clinical Research Network clinical sites that participated on this protocol:

Sites are listed in order by number of subjects enrolled into the study. The number of subjects enrolled is noted in parenthesis preceded by the site location and the site name. Personnel are listed as (I) for Study Investigator, (C) for Coordinator, (V) Visual Acuity Technician, and (P) for Photographer.

**Charlotte, NC Charlotte Eye, Ear, Nose and Throat Assoc., PA (50):** David Browning(I); Andrew N. Antoszyk(I); Angela K. Price (C,V); Sherry L. Fredenberg (C,V); Jenna T. Herby (C,V); Christina J. Fleming (C,V); Ashley A. McClain (C,V); Sarah A. Ennis(V); Kelly R. Gallagher(V); Angella S. Karow(V); Autumn C. Grupp(V); Danielle Puskas(P); Lynn Watson(P); Swann J. Bojaj(P); Uma M. Balasubramaniam(P); Donna McClain(P); Donna R. Styles(P); Jeff A. Kuopus(P); Kathryn Kimrey(P); Loraine M. Clark(P); Lisa A. Jackson(P); Michael D. McOwen(P); Matt Dunlap(P); Susannah J. Held(P) **Santa Barbara, CA California Retina Consultants (28):** Dante J. Pieramici(I); Ma'an A. Nasir(I); Alessandro A. Castellarin(I); Dilsher Dhoot(I); Sarah Fishbein (C,V); Jack Giust(C); Lisha Wan (C,V); Michelle S. Hanna (C,V); Melvin D. Rabena(C); Jerry Smith(V); Layne J. Bone(V); Kelly Avery(V); Matthew Giust(P); Aimee Walker(P); Aimee H. Shook(P); Sara Esau(P); Nitce L. Ruvalcaba(P) **West Columbia, SC Palmetto Retina Center (28):** John A. Wells(I); W. Lloyd Clark(I); David L. Johnson(I); John F. Payne(I); Tiffany R. Swinford (C,V); Mallie M. Taylor(C); Cassandra L. Garrison(C); Peggy D. Miller (C,V); Amber R. Houlahan(V); Charlotte A. O'Neill(V); Ashley Floyd(V); Crystal C. Parker(V); Courtney Sease(V); Tara Graham(V); Robin Spencer(V); Tiffany N. Ogbuewu(V); Ashley Studebaker(P); Tyler Huggins(P); Robbin Spivey(P); Brian Jones(P); Ashley Williams(P); Ron Petty(P); Erin L. Poston(P); G. Michael Ward(P) **Paducah, KY Paducah Retinal Center (24):** Carl W. Baker(I); Ron H. Tilford(I); Tracey M. Caldwell(C); Lynnette F. Lambert (C,V); Mary J. Palmer(V); Tracey R. Martin(V); Tana R. Williams(P); Samantha Kettler(P); Alecia B. Camp(P) **Boston, MA Joslin Diabetes Center/Harvard Vanguard Medical Associates (22):** Paolo S. Silva(I); Paul G. Arrigg(I); George S. Sharuk(I); Sabera T. Shah(I); Jennifer K. Sun(I); Corey Westerfeld(I); Christopher Michael Andreoli(I); Lloyd Paul Aiello(I); Deborah Schlossman (I); Timothy Murtha (I); Hanna Kwak(C); Flor M. Flores (C,V); Margaret E. Stockman (C,V); Troy Kieser (C,V); Michael N. Krigman(V); Leila Bestourous(V); Elizabeth S. Weimann(V); Jerry D. Cavallerano(V); Kristen M. Hock(V); Mary Ann Robertson(V); Rita K. Kirby(V); Steve L. Papaconstantinou(V); Kylie M. Madigan(P); Robert W. Cavicchi(P); Kate A. Palitsch(P); Taygan Yilmaz(P) **Austin, TX Retina Research Center (20):** Brian B. Berger(I); Chirag D. Jhaveri(I); Tori Moore(C); Ginger J. Manhart(C); Rachel A. Walsh(C); Ivana Gunderson (C,V); Dietrich Riepen(V); Chelsey A. Bravenec(V); Ryan M. Reid(V); Yong Ren(P); Ben Ostrander(P); Christopher C. Stovall(P) **Baltimore, MD Elman Retina Group, P.A. (18):** Michael J. Elman(I); Robert A. Liss(I); Henry A. Leder(I); JoAnn Starr(C); Jennifer L. Belz(C); Charlene K. Putzulo(C); Dallas R. Sandler(V); Jennifer L. Simmons(V); Pamela V. Singletary(V); Ashley Davis(V); Perel M. Simpson(V); Teresa Coffey(V); Daniel J. Ketner(P); Terri Cain(P); Ashley M. Metzger(P); Peter Sotirakos(P) **Baltimore, MD Elman Retina Group, P.A. (18):** Michael J. Elman(I); Robert A. Liss(I); Henry A. Leder(I); JoAnn Starr(C); Jennifer L. Belz(C); Charlene K. Putzulo(C); Dallas R. Sandler(V); Jennifer L. Simmons(V); Pamela V. Singletary(V); Ashley Davis(V); Perel M. Simpson(V); Teresa Coffey(V); Daniel J. Ketner(P); Terri Cain(P); Ashley M. Metzger(P); Peter Sotirakos(P) **Augusta, GA Southeast Retina Center, P.C. (17):** Dennis M. Marcus(I); Harinderjit Singh(I); Courtney N. Roberts(C); Geri L. Floyd(C); Siobhan O. Ortiz(C); Virginia Mims(V); L. Allison Foster(V); Christy Coursey(V); Jared C. Gardner(P); Ken Ivey(P) **Richmond, VA Retina Institute of Virginia (15):** John Stewart O'Keefe(I); Juan A. Astruc(I); Bryan J. Schwent(I); Ali R. Tabassian(I); Suzette A. Rosen(C); David C. Vaughan(V); Jeffrey Michaels(V); Natalie J. Arndt(V); John J. Maziarz(P) **Lakeland, FL Florida Retina Consultants (14):** Scott M. Friedman(I); Nader Moinfar(I); Kimberly A. Williamson (C,V); Damanda F. Fagan (C,V); Katrina L. Dawson(C); Paige N. Walters(V); Allen McKinney(P); Steve Carlton(P) **Salt Lake City, UT Retina Associates of Utah, P.C. (14):** Robert C. Kwun(I); Victoria L. Knudsen(I); Kirk E. Winward(I); Mano Swartz(I); James G. Howard(I); Michelle Riley(C); Gena Taylor(V); Michelle Holt(P); Jason G. Winward(P); Adam Walsh(P); Teresa Taylor(P); Daniel Walsh(P) **Syracuse, NY Retina-Vitreous Surgeons of Central New York, PC (13):** G. Robert Hampton(I); Jamin S. Brown(I); Rajeev K. Seth(I); Laurie J. Sienkiewicz(C); Deborah A. Appleton(C); Cindy J. Grinnell(C); Charity A. Cowley(C); Lynn M. Kwasniewski(V); Michelle L. Manley(V); Nicole E. Robarge(P); Stefanie R. DeSantis(P); Peter B. Hay(P); Teresa M. DeForge(P) **Houston, TX Retina Consultants of Houston, PA (12):** Charles C. Wykoff(I); Tien P. Wong(I); Eric Chen(I); David M. Brown(I); Rosa Y. Kim(I); James C. Major(I); Amy C. Scheffler(I); Richard H. Fish(I); Matthew S. Benz(I); Meredith Lipman(C); Amy Hutson(C); Nubia Landaverde(C); Ashley E. Chancey(C); Cassie Cone(C); Tressa Royse(V); Veronica A. Sneed(V); Belinda A. Almanza(V);

Brenda Dives(V); Beau A Richter(P); Eric N. Kegley(P) **Portland, OR Casey Eye Institute (12)**: Andreas K. Lauer(I); Christina J Flaxel(I); Steven T. Bailey(I); Mitchell Schain (C,V); Ann D. Lundquist (C,V); Shelley A. Hanel(C); Shirley D. Ira(V); Susan K. Nolte(V); Peter N. Steinkamp(P); Dawn M. Ryan(P); Scott R. Pickell(P); Jocelyn T. Hui(P); Michelle Brix(P); Jordan Barth(P); Chris S Howell(P) **Shawnee Mission, KS Retina Associates, P.A. (12)**: Gregory M. Fox(I); Blake A. Cooper(I); Ivan R. Battle(I); Lexie R. Manning(C); Karla A. Battle(C); Holly Wyrick(V); Katherine Pippin(P); Samantha Perkins(P); Frank T. Yeager(P) **Amarillo, TX Southwest Retina Specialists (11)**: Ryan B. Rush(I); Glenn R. Gardner(C); Christi Rush(C); Johnathan R. Hawkins(V); Brenda Dumas(V); Ben Ysasaga(P) **Boston, MA Ophthalmic Consultants of Boston (11)**: Chirag P. Shah(I); Michael G. Morley(I); Torsten W. Wiegand(I); Tina S. Cleary(I); Trexler M. Topping(I); Lindsey Colegrove (C,V); Katharine Bechtel (C,V); Britta Johnson (C,V); Lisa Lebedew(V); Natacha Lorius(V); Sandy G. Chong(V); Jennifer L. Stone(V); Michael Cullen Jones(P); Dennis Donovan(P); Sherry Malone(P); Margie Graham(P); Audrey Santos(P); Steve A. Bennett(P) **St. Louis, MO The Retina Institute (11)**: Kevin J. Blinder(I); Bradley T. Smith(I); Ginny S. Nobel(C); Rhonda F. Weeks(C); Erika A. Hoehn(C); Maria A. Stuart(V); Kelly E. Pepple(V); Lynda K. Boyd(V); Brook G. Pulliam(V); Steve A Schremp(P); Stephanie L. Guevara(P); Jarrod Wehmeier(P); Timothy L Wright(P); Dana L Gabel(P) **Beachwood, OH Retina Associates of Cleveland, Inc. (10)**: David G. Miller(I); Jerome P. Schartman(I); Lawrence J. Singerman(I); Joseph M. Coney(I); Michael A. Novak(I); Llewelyn J. Rao(I); Susan C. Rath (C,V); Elizabeth McNamara (C,V); Lorraine Stone(C); Veronica A. Smith(C); Cecelia Rykena(V); Kimberly A. DuBois(V); Mary A Ilc(V); Vivian Tanner(V); Kim Drury(V); Trina M. Nitzsche(P); Gregg A. Greanoff(P); John C. DuBois(P) **Plantation, FL Fort Lauderdale Eye Institute (10)**: Stuart K. Burgess(I); Tirso M. Lara(I); Noel H. Pereda(C); Cindy V. Fernandez (C,V); Deborah Davis(V); Evelyn Quinchia(V); Karen Workman(P) **West Des Moines, IA Wolfe Eye Clinic (10)**: Jared S. Nielsen(I); Jeong-Hyeon Sohn(I); Kyle J. Alliman(I); David D. Saggau(I); Marianne Parker (C,V); Bethany George(C); Carrie L. Eastvold(C); Kristin Sells(C); Tami Jo Woehl(C); Marilyn A. Johnson(V); Holly Keenan(V); Jennifer L. Coleman(V); Jamie Spillman(V); Shannon Freeman(P); Leigh S Schmidt(P); Lisa M. Boender(P); Jill L. Partin(P); Bailey R. Bennett(P); Jay Rostvold(P) **Asheville, NC Western Carolina Retinal Associates, PA (9)**: Cameron McLure Stone(I); Lea R. Raymer(C); Andrea K. Menzel(C); Leslie D. Rickman(V); Barbara Campbell(V); Lorraine P. Sherlin(V); Lisa H. Hawkins(P); Melissa L. Buckner(P); Olesya N. Matsipura(P); Paula A. Price(P) **Fort Myers, FL National Ophthalmic Research Institute (9)**: A. Thomas Ghuman(I); Paul A. Raskauskas(I); Ashish G. Sharma(I); Glenn Wing(I); Joseph P. Walker(I); Eileen Knips(C); Cheryl Kiesel(C); Crystal Y. Peters(C); Cheryl Ryan(C); Laura Greenhoe(C); Natalie N. Torres(C); Rebecca J Youngblood(C); Danielle Turnbo(V); Anita H. Leslie(V); Etienne C. Schoeman(P); Raymond K. Kiesel(P) **Oklahoma City, OK Dean A. McGee Eye Institute (9)**: Ronald M. Kingsley(I); Vinay A. Shah(I); Robert E. Leonard(I); Heather R. Miller(C); Sonny Icks(C); Vanessa A. Bergman (C,V); Vanessa K. Drummond(C); Brittany L Ross (C,V); Reshial D. Ellis(C); Tina R. Whittington(V); Shannon R. Almeida(V); Amanda M Butt(P); Russ Burris(P) **Portland, OR Retina Northwest, PC (9)**: Mark A. Peters(I); Michael S. Lee(I); Paul S. Tlucek(I); Colin Ma(I); Stephen Hobbs (C,V); Amanda C. Milliron (C,V); Stephanie L. Ho (C,V); Marcia Kopfer(V); Joe Logan(P); Christine Hoerner(P) **Houston, TX Retina and Vitreous of Texas (8)**: Joseph A. Khawly(I); Hassan T. Rahman(I); Diana Abdelgani(C); Pam S. Miller (C,V); Debbie Fredrickson(V); Erica Pineda(V); Desiree Lopez(P); Donald K. Lowd(P); Colin Blank(P); Lorena R. Martinez(P); Jason E. Muniz(P) **Madison, WI University of Wisconsin-Madison, Dept of Ophthalmology/Retina Service (8)**: Justin Gottlieb(I); Michael S. Ip(I); Barbara A. Blodi(I); Kristine A. Dietzman (C,V); Kathryn F. Burke(C); Christopher M. Smith (C,V); Shelly R. Olson(V); Angela M. Wealti(V); Sandie L. Reed(P); Denise A. Krolnik(P); John C. Peterson(P) **McAllen, TX Valley Retina Institute (8)**: Victor Hugo Gonzalez(I); Roberto Diaz-Rohena(I); Juan G. Santiago(I); Rohit Adyanthaya(I); Nehal R. Patel(I); Deyla Anaya(C); Dina Garcia(C); Edna E. Cruz(C); Crystal A. Alvarez(C); Ruth Iracheta(C); Jessica Rodriguez(C); Monica R. Cantu(V); Rebecca R. Flores(V); Hector Jasso(V); Rachel Rodriguez(V); Karina Miranda(V); Krystle R. Lozano(V); Maricela Garza(V); Lazaro Aguero(P); Amanda L. Sandoval(P); Monique Montemayor(P); Samuel Alonso(P); Santos Garza(P) **Rochester, NY University of Rochester (8)**: David Allen DiLoreto(I); Rajeev S. Ramchandran(I); David M. Kleinman(I); George W. O'Gara(C); Andrea M. Czubinski (C,V); Peter MacDowell(C); Kari M. Steinmetz(C); Dan A Castillo(V); Yvonne F Yu(V); Salina M. Tongue(V); Melissa S Keim(V); Rachel Hollar(P); Brandi N Deats(P); Brittany S. Richardson(P); Lynn Singer(P); Taylor A. Pannell(P) **Walnut Creek, CA Bay Area Retina Associates (8)**: Stewart A. Daniels(I); Tushar M. Ranchod(I); Craig J. Leong(I); Stacey Touseon (C,V); Shannon R. Earl(C); Melissa C Bartlett(V); Christine Fernando(V); Djorella Factor(V); Jessica Garcia(V); Anna K. Nguyen(P); Betty Hom(P); Cathy Walker(P); Grace M. Marudo(P); Jose Carlos Suazo(P); Leah M. McNeil(P); Fred Hanamoto(P); Matthew D. Hughes(P) **Grand Blanc, MI Retina Vitreous Center (7)**: Robin D. Ross(I); Susan M. Sanford(C); Nicole Martini Markiewicz(C); Tracy M. Utley (C,V); Shannon Henderson(V); Joanie H. Lippincott(P); Patricia Streasick(P) **Grand Rapids, MI Vitreo-Retinal Associates (7)**: Louis C. Glazer(I); Frank W. Garber(I); Jeffrey D. Zheutlin(I); Angela D. Listerman (C,V); Christine E. Feehan(V); Heather L. Cruz(V); Donald E. Kuitula(P); Olivia P. Rainey(P); Sue Weatherbee(P) **Knoxville, TN**

**Southeastern Retina Associates, P.C. (7):** Joseph M. Googe(I); R. Keith Shuler(I); Nicholas G. Anderson(I); Stephen L. Perkins(I); Kristina Oliver(C); Nicole Grindall(V); Ann Arnold(V); Jennifer Beerbower(V); Cecile Hunt(V); Kathy L. Schulz(V); Sarah M. Oelrich(P); Jerry K. Whetstone(P); Justin Walsh(V); Chris Morris(P) **Austin, TX Austin Retina Associates (6):** Robert W. Wong(I); Peter A. Nixon(I); Jeni L. Leon(C); Chris A. Montesclaros(C); Carrie E. Leung(C); Phill Le(V); Codey L. Harborth(P); Margaret A. Rodriguez(P); Cory Mangham(P) **Grand Rapids, MI Retina Specialists of Michigan (6):** Thomas M. Aaberg(I); Scott J. Westhouse(I); Holly L. Vincent (C,V); Rebecca Malone(V); Kathy L. Karsten(P) **Indianapolis, IN Raj K. Maturi, M.D., P.C. (6):** Raj K. Maturi(I); Ashley M. Harless (C,V); Carolee K. Novak (C,V); Laura A. Bleau (C,V); Thomas Steele(P); Charlotte Harris(P); Alisha Bildner(P); Abby Maple(P) **Lexington, KY Retina and Vitreous Associates of Kentucky (6):** Thomas W. Stone(I); Rick D. Isernhagen(I); John W. Kitchens(I); Diana M. Holcomb (C,V); Jeanne Van Arsdall(V); Michelle Buck(P); Edward A Slade(P) **Albuquerque, NM Eye Associates of New Mexico (5):** Mark T. Chiu(I); Ashok K. Reddy(I); Frank W. Wyant(I); Mary M. Montano-Niles(C); Lorraine J. Carter (C,V); Shirley Maerki(V); Laura Tartaglia(V); Paul P. Gomez(P); Stephen A. Maestas(P); Camille Shanta(P); Lisbrenda M. Jimenez(P) **Atlanta, GA Georgia Retina, P.C. (5):** Robert A. Stoltz(I); Stephanie L. Vanderveldt(I); Scott I. Lampert(I); Leslie G. Marcus(C); Shelly Fulbright(V); James P. Martin(P) **Beverly Hills, CA Retina-Vitreous Associates Medical Group (5):** Roger L. Novack(I); David S. Liao(I); Tammy Eileen Lo(C); Janet Kurokouchi(C); Richard Ngo(C); Connie V. Hoang(C); Julio Sierra(V); Adam Zamboni(V); Eric G. Protacio(P); Jeff Kessinger(P) **Chapel Hill, NC University of North Carolina, Kittner Eye Center (5):** Seema Garg(I); Odette M. Houghton(I); Jan Niklas Ulrich(I); Sai H. Chavala(I); Elizabeth L. DuBose (C,V); Cassandra J. Barnhart (C,V); Megha Karmalkar (C,V); Pooja D. Jani(V); Justin Goble(V); Debra Cantrell(P); Rona Lyn Esquejo(P) **Edmond, OK Retina Vitreous Center (5):** Sandeep N. Shah(I); Natasha Harmon (C,V) **Ft. Lauderdale, FL Retina Group of Florida (5):** Mandeep S. Dhalla(I); Mario R. del Cid(I); Lawrence S. Halperin(I); Jaclyn A. Brady(C); Monica Hamlin(C); Monica L. Lopez (C,P); Jamie Mariano(V); Candace M. Neale(P); Rita R. Veksler(P); Angelica Mannarelli(P) **Houston, TX Baylor Eye Physicians and Surgeons (5):** Robert E. Coffee(I); Petros Euthymiou Carvounis(I); Pejman Hemati (C,V); Cindy J. Dorenbach (C,V); Annika S. Joshi (C,V); April Leger(V); Dana B. Barnett(P); Joseph F. Morales(P) **Leesburg, VA Virginia Retina Center (5):** Sam E. Mansour(I); Cathy Choyce (C,V); Aissa L. Dirawatun(V); Emma A. Nagy(V); Jamie C Kerkstra(P) **Loma Linda, CA Loma Linda University Health Care, Department of Ophthalmology (5):** Joseph T. Fan(I); Mukesh Bhogilal Suthar(I); Michael E. Rauser(I); Gisela Santiago (C,V); Liel Marvyn Cerdenio(C); Brandi J Perez (C,V); Kara E. Halsey (C,V); William H. Kiernan(V); Jesse Knabb(P); Rachel Catren(P) **Lubbock, TX Texas Retina Associates (5):** Michel Shami(I); Brenda K. Arrington (C,V); Keri S. Neuling(C); Ashaki Meeks(V); Natalie R. Garcia(V); Kayla Blair(P); Ginger K. Rhymes(P); Janet Medrano(P) **Milwaukee, WI Medical College of Wisconsin (5):** Judy E. Kim(I); David V. Weinberg(I); Kimberly E. Stepien(I); Thomas B. Connor(I); Vesper V. Williams(C); Tracy L. Kaczanowski(C); Krissa L. Packard(C); Judy Flanders(V); Vicki Barwick(V); Pat A. Winter(V); Joseph R. Beringer(P); Kathy J. Selchert(P) **Orlando, FL Magruder Eye Institute (5):** John T. Lehr(I); Elaine Rodriguez-Roman(C); Teri Jones(V); Martha Eileen Haddox(V); Mark Pena(P); Brenda Hernandez(P) **Palm Desert, CA Southern California Desert Retina Consultants, MC (5):** Clement K. Chan(I); Maziar Lalezary(I); Steven G Lin(I); Kimberly S. Walther(C); Tiana Gonzales(C); Lenise E. Myers(V); Kenneth M. Huff(P) **Portsmouth, NH Eyesight Ophthalmic Services, PA (5):** Richard Chace(I); Sunny Kallay(C); Kirsten Stevens(V); Nicole Dolbec(V); Ronda Baker-Hill(V); Janea Surette(P) **Rochester, NY Retina Associates of Western New York (5):** Steven J. Rose(I); Brian P. Connolly(I); Ernest G. Guillet(I); Edward F. Hall(I); Margaret M. Yagoda(C); Mary Jo Doran(C); Mindy Burgess(V); Ann Reynard(V); Margaret Powers(P); Joe Territo(P) **San Antonio, TX Retinal Consultants of San Antonio (5):** Calvin E. Mein(I); Moises A. Chica(I); R. Gary Lane(I); Sarah Elizabeth Holy(I); Lita Kirschbaum (C,V); Vanessa D Martinez(C); Jaynee Baker(C); Christa G. Kincaid(V); Elaine Castillo(P); Christopher Sean Wienecke(P); Sara L Schlichting(P); Brenda Nakoski(P) **Westlake Village, CA Retinal Consultants of Southern California Medical Group, Inc. (5):** Kenneth R. Diddie(I); Deborah M. Cadwell(C); Louise Van Arsdale(V); Taryn F. Boisvert(P); Joyce Galonsky(P); Susie O'Hayer(P); Melissa L. Johnson(P) **Worcester, MA Vitreo-Retinal Associates, PC (5):** Frank J. McCabe(I); Brad J. Baker(I); Melvyn H. Defrin(I); Marie V. Lampson(C); Heather Pratte(V); Selena A. Baron(V); Aundrea S. Borelli(V) **Columbus, OH OSU Eye Physicians and Surgeons, LLC. (4):** Frederick H. Davidorf(I); Michael B. Wells(I); Susie Chang(I); John Byron Christoforidis(I); Alan D. Letson(I); Jill A Salerno(C); Jerilyn G. Perry(V); Stephen E. Shelley(P); Patrick J. Fish(P) **Dubuque, IA Medical Associates Clinic, P.C. (4):** Michael H. Scott(I); James A. Dixon(I); Shannon R. Walsh(C); Philomina M. Ozpirincci(C); Brenda L. Tebon(P); Marcia J. Moyle(P) **Lancaster, PA Family Eye Group (4):** Michael R. Pavlica(I); Noelle S Matta (C,V); Cristina M. Brubaker(P); Alyson B. Backer(P) **Newark, NJ The Institute of Ophthalmology and Visual Science (IOVS) (4):** Neelakshi Bhagat(I); Catherine Fay (C,V); Tatiana Mikheyeva(P); Michael Lazar(P); Janie D. Ellenberger(P); Beth Malpica(P) **Philadelphia, PA University of Pennsylvania Scheie Eye Institute (4):** Alexander J. Brucker(I); Benjamin J. Kim(I); Brian L. VanderBeek(I); Sheri Drossner (C,V); Joan C. DuPont (C,V); Rebecca Salvo(C); Stephanie B.

Engelhard(C); Jim M. Berger(P); Sara Morales(P); Beth Serpentine(P) **Sandy Springs, GA Thomas Eye Group (4):** Paul L. Kaufman(I); Jessica D. McCluskey(I); Kathy T. Wynne (C,V); Julian Jordan(P); Brandun Watson(P) **Spokane, WA Spokane Eye Clinic (4):** Robert S. Wirthlin(I); Eric S. Guglielmo(I); Eileen A. Dittman (C,V); Dylan C. Waidelich (C,V); Cristofer J. Garza(P); Adeline M. Stone(P); Ashley Nicole Oakes(P) **Tampa, FL Retina Associates of Florida, P.A. (4):** Ivan J. Suner(I); Mark E. Hammer(I); Marc C. Peden(I); Janet R. Traynom(C); Rochelle DenBoer(C); Heidi Vargo(V); Susan Ramsey(V); Anita Kim Malzahn(P); Debra Jeffres(P) **Trumbull, CT New England Retina Associates, PC (4):** Nauman A. Chaudhry(I); Sumit P. Shah(I); Gregory M. Haffner(I); Emiliya German(C); Shannan Moreau(C); Laura A. Fox (C,V); Jennifer M. Matteson(C); JoAnna L. Pelletier(C); Alison Fontecchio(V); Emily Morse(P); Greg McNamara(P); Marie Grace Laglivia(P); Marissa L. Scherf(P); Angela LaPre(P); Justin A. Cocilo(P) **Albuquerque, NM University of New Mexico Health Sciences Center (3):** Arup Das(I); Linda Friesen(C); Michele Franco(V); Johnny Lucero(V); Melissa Frazier(V); Robert Laviolette(P) **Bronx, NY Montefiore Medical Center (3):** Umar Khalil Mian(I); Rebecca L. Riemer(C); Evelyn Koestenblatt(C); Louise V. Wolf(C); Christine Kim(V); Irina Katkovskaya(V); Erica Otoo(V); Kevin A. Ellerbe(P); Kenneth Boyd(P); Caroline Costa(P) **Detroit, MI Henry Ford Health System, Dept of Ophthalmology and Eye Care Services (3):** Paul Andrew Edwards(I); Hua Gao(I); Thomas Hessburg(I); Uday Desai(I); Janet Murphy (C,V); Mary K. Monk (C,V); Julianne Hall (C,V); Melina Mazurek (C,V); Katie M. Ventimiglia (C,V); Brian A. Rusinek(P); Bradley A. Stern(P); Kris Brouhard(P); Katie M. Weier(P); Megan Allis(P); Jenny Shaken(P); Nicole M. Massu(P); Tracy A. Troszak(P); David Burley(P) **Minneapolis, MN Retina Center, PA (3):** Abdhish R. Bhavsar(I); Geoffrey G. Emerson(I); Jacob M. Jones(I); Tracy A. Anderson (C,P); Andrea Gilchrist(C); Matt D. Peloquin (C,P,V); Gaid Gaid(V); Yang Vang(V); Samantha Ryan(P); Denise Vang(P); Alanna C. Evans(P); Tonja Scherer(P) **New Albany, IN John-Kenyon American Eye Institute (3):** Howard S. Lazarus(I); Debra Paige Bunch (C,V); Liana C. Davis (C,V); Kelly Booth(V); Margaret Trimble(P); Mary A. Bledsaw(P); Jay Moore(P) **New York, NY Macula Care (3):** Daniel F. Rosberger(I); Sandra Groeschel(C); Miriam A. Madry(C); Nikoletta DiGirolamo(C); Dustin Pressley(V); Robert Santora(P); Yenelda M. Gomez(V) **Pittsburgh, PA Retina Vitreous Consultants (3):** Karl R. Olsen(I); Robert L. Bergren(I); P. William Conrad(I); Pamela P. Rath(I); Avni Patel Vyas(I); Judy C Liu(I); Lori A. Merlotti(C); Jennifer L. Chamberlin(C); Holly M. Mechling(C); Mary E. Kelly(C); Kellianne Marfisi(V); Kimberly A. Yeckel(V); Veronica L. Bennett(V); Christina M. Schultz(V); Grace A. Rigoni(V); Julie Walter(V); Missy A. Forish(V); Amanda Fec(P); Courtney L. Foreman(P); David Steinberg(P); Keith D McBroom(P) **Sarasota, FL Sarasota Retina Institute (3):** Melvin C. Chen(I); Marc H. Levy(I); Waldemar Torres(I); Peggy Jelemensky(C); Tara L. Raphael(V); Joann Rich(V); Mark Sneath(P) **Seattle, WA University of Washington Medical Center (3):** James L. Kinyoun(I); Gurunadh Atmaram Vemulakonda(I); Susan A. Rath (C,V); Patricia K. Ernst (C,V); Juli A. Pettingill(V); Ronald C. Jones(P); Brad C. Clifton(P); James D. Leslie(P) **Baltimore, MD Wilmer Eye Institute at Johns Hopkins (2):** Sharon D. Solomon(I); Neil M. Bressler(I); Lisa K. Levin(C); Deborah Donohue (C,V); Mary Frey (C,V); Lorena Larez(V); Keisha Murray(V); Rita L. Denbow(V); Janis Graul(P); David Emmert(P); Charles Herring(P); Nick Rhoton(P); Joe Belz(P) **Chicago, IL Northwestern Medical Faculty Foundation (2):** Alice T. Lyon(I); Rukhsana G. Mirza(I); Amanda M. Krug (C,V); Carmen Ramirez (C,V); Lori Kaminski(C); Anna Liza M. Castro-Malek (C,V); Amber N. Mills(V); Zuzanna Rozenbajgier(V); Marriner L. Skelly(P); Evica Simjanoski(P); Andrea R. Degillio(P) **Chicago, IL University of Illinois at Chicago Medical Center (2):** Jennifer I. Lim(I); Felix Y. Chau(I); Marcia Niec(C); Tametha Johnson(V); Yesenia Ovando(V); Mark Janowicz(P); Catherine Carroll(P) **Columbia, SC Carolina Retina Center (2):** Jeffrey G. Gross(I); Barron C. Fishburne(I); Amy M. Flowers (C,V); Riley Stroman (C,V); Christen Ochieng (C,V); Angelique SA McDowell(V); Ally M. Paul(P); Randall L. Price(P) **Honolulu, HI Retina Associates of Hawaii, Inc. (2):** John H. Drouilhet(I); Erica N. Lacaden(C); Deborah J. Nobler (C,V) **Kingsport, TN Southeastern Retina Associates, PC (2):** Howard L. Cummings(I); Deanna Jo Long (C,V); Ben McCord(V); Jason Robinson(V); Jamie Swift(P); Julie P. Maynard(P) **New York, NY Mount Sinai School of Medicine, Dept. of Ophthalmology (2):** Patricia J. Pahk(I); Hannah Palmer-Dwore(C); Dipali H. Dave (C,V); Mariebelle Pacheco(V); Barbara A. Galati(P); Eneil Simpson(P) **Rochester, MN Mayo Clinic Department of Ophthalmology (2):** Andrew J. Barkmeier(I); Diane L. Vogen(C); Karin A. Berg(V); Shannon L. Howard(V); Jean M. Burrington(V); Jessica Ann Morgan(V); Joan T. Overend(V); Shannon Goddard(P); Denise M. Lewison(P); Jaime L. Tesmer(P) **Winston-Salem, NC Wake Forest University Eye Center (2):** Craig Michael Greven(I); Joan Fish (C,V); Cara Everhart (C,V); Mark D. Clark(P); David T Miller(P) Atlanta, GA Emory Eye Center (1) Andrew M. Hendrick(I); George Baker Hubbard(I); Jiong Yan(I); Blaine E. Cribbs(I); Linda T. Curtis (C,V); Judy L. Brower (V); Jannah L. Dobbs(P); Debora J. Jordan(P) **Cleveland, OH Case Western Reserve University (1):** Baseer U. Ahmad(I); Suber S. Huang(I); Hillary M. Sedlacek(C); Cherie L. Hornsby(C); Lisa P. Ferguson(C); Kathy Carlton(V); Kelly A. Sholtis(V); Peggy Allchin(V); Claudia Clow(V); Mark A. Harrod(P); Geoffrey Pankhurst(P); Irit Baum-Rawraway(P); Stacie A. Hrvatin(P) **New York, NY The New York Eye and Ear Infirmary/Faculty Eye Practice (1):** Ronald C. Gentile(I); Alex Yang (C,V); Wanda Carrasquillo-Boyd(P); Robert Masini(P) **Ocala, FL Ocala Eye Retina Consultants (1):** Chander N. Samy(I);

Robert J. Kraut(I); Kathy Shirley(C); Linsey Corso(C); Karen Ely(V); Elizabeth Scala(P); Stewart Gross(P); Vanessa Alava(P) **Omaha, NE University of Nebraska Medical Center, Department of Ophthalmology (1)**: Eyal Margalit(I); Donna G. Neely(C); Maria Blaiotta(V); Lori Hagensen(P) **Tucson, AZ Retina Associates (1)**: April E. Harris(I); Rita L. Lennon(C); Denice R. Cota(V); Larry Wilson(P).

**Protocol Development Committee:** John A. Wells, III, Lloyd P. Aiello, Roy W. Beck, Neil M. Bressler, Susan B. Bressler, Kakarla V. Chalam, Ronald P. Danis, Bambi J. Arnold-Bush, Frederick Ferris, Scott M. Friedman, Adam R. Glassman, Michael H. Scott, Jennifer K. Sun, Robert W. Wong.

**DRCR.net Coordinating Center: Jaeb Center for Health Research, Tampa, FL (staff as of 11/19/14):** Adam R. Glassman (Director and Principal Investigator), Roy W. Beck (Executive Director), Talat Almuthtar, Bambi J. Arnold-Bush, Brian B. Dale, Alyssa Baptista, Crystal Connor, Jasmine Conner, Sharon R. Constantine, Kimberly Dowling, Simone S. Dupre, Allison R. Ayala, Meagan L. Huggins, Seidu Inusah, Paula A. Johnson, Brenda L. Loggins, Shannon L. McClellan, Michele Melia, Eureka Battle, Cynthia R. Stockdale, Danielle Stanley

**Duke Reading Center:** (Staff as of 9-26-14) Glenn Jaffe, MD, Brannon Balsley, Michael Barbas, Russell Burns, Dee Busian, Ryan Ebersohl, Cynthia Heydary, Sasha McEwan, Justin Myers, Amanda Robertson, Kelly Shields, Garrett Thompson, Katrina Winter, Ellen Young

**Fundus Photograph Reading Center:** University of Wisconsin-Madison, Madison, WI (staff as of 9/23/14): Ronald P. Danis, Matthew D. Davis, Yijun Huang, Barbara Blodi, Amitha Domalpally, James Reimers, Pamela Vargo, Hugh Wabers, Dawn Myers, Daniel Lawrence, James Allan

**DRCR.net Network Chair:** Lee M. Jampol (2013-present), Neil M. Bressler (2006-2012)

**DRCR.net Vice Chairs:** Andrew Antoszyk (2013 – present), Carl W. Baker (2011-2013), Jennifer K. Sun (2012-present), John A. Wells, III (2013- present), Scott Friedman (2009-2012), Susan B. Bressler (2009-2011), Ingrid U. Scott (2009-2010)

**National Eye Institute:** Eleanor Schron (2009-current), Donald F. Everett (2003-2006, 2007-2009), Päivi H. Miskala (2006-2007)

**Data Safety and Monitoring Committee:** John Connett (Chair), Gary Abrams, Deborah R. Barnbaum, Harry Flynn, Ruth S. Weinstock, Charles P. Wilkinson, Stephen Wisniewski, Saul Genuth (2006-2013), Robert Frank (2006-2012)

**Executive Committee:** Lloyd Paul Aiello (2002-present; Chair 2002 – 2005), Andrew N. Antoszyk (2009; 2014 - present), Carl W. Baker (2009-present), Roy W. Beck (2002-present), Neil M. Bressler (2006-present; Chair 2006 - 2008), Susan B. Bressler (2009-Present), Ronald P. Danis (2004-present), Matthew D. Davis (2002-present), Michael J. Elman (2006-present; Chair 2009 and 2012), Frederick L. Ferris III (2002-present), Adam R. Glassman (2005-present), Jeffrey G. Gross (2012-present), Glenn J. Jaffe (2012-present), Lee M. Jampol (2012-present; Chair 2013-present), Raj K. Maturi (2009-2011, 2013- Present), Eleanor Schron (2009-present), Jennifer K. Sun (2009-present), John A. Wells, III (2012-present). Prior Members: Abdhish Bhavsar (2007-2008, 2010-2012), Alexander J. Brucker (2009-2011), Kakarla V. Chalam (2009-2011), Donald F. Everett (2002-2009), Joan Fish (2008 - 2009), Scott Friedman (2007 –2013), Joseph Googe, Jr. (2009-2011), Diana M. Holcomb (2011-2012), Andreas Lauer (2007-2008), Dennis M. Marcus (2011-2012), Ashley McClain (2013); Brandi J. Perez (2013), Ingrid U. Scott (2009-2010), JoAnn Starr (2009-2011).

**Figure S1A. Diabetic Macular Edema Treatment with anti-VEGF during Follow-up**

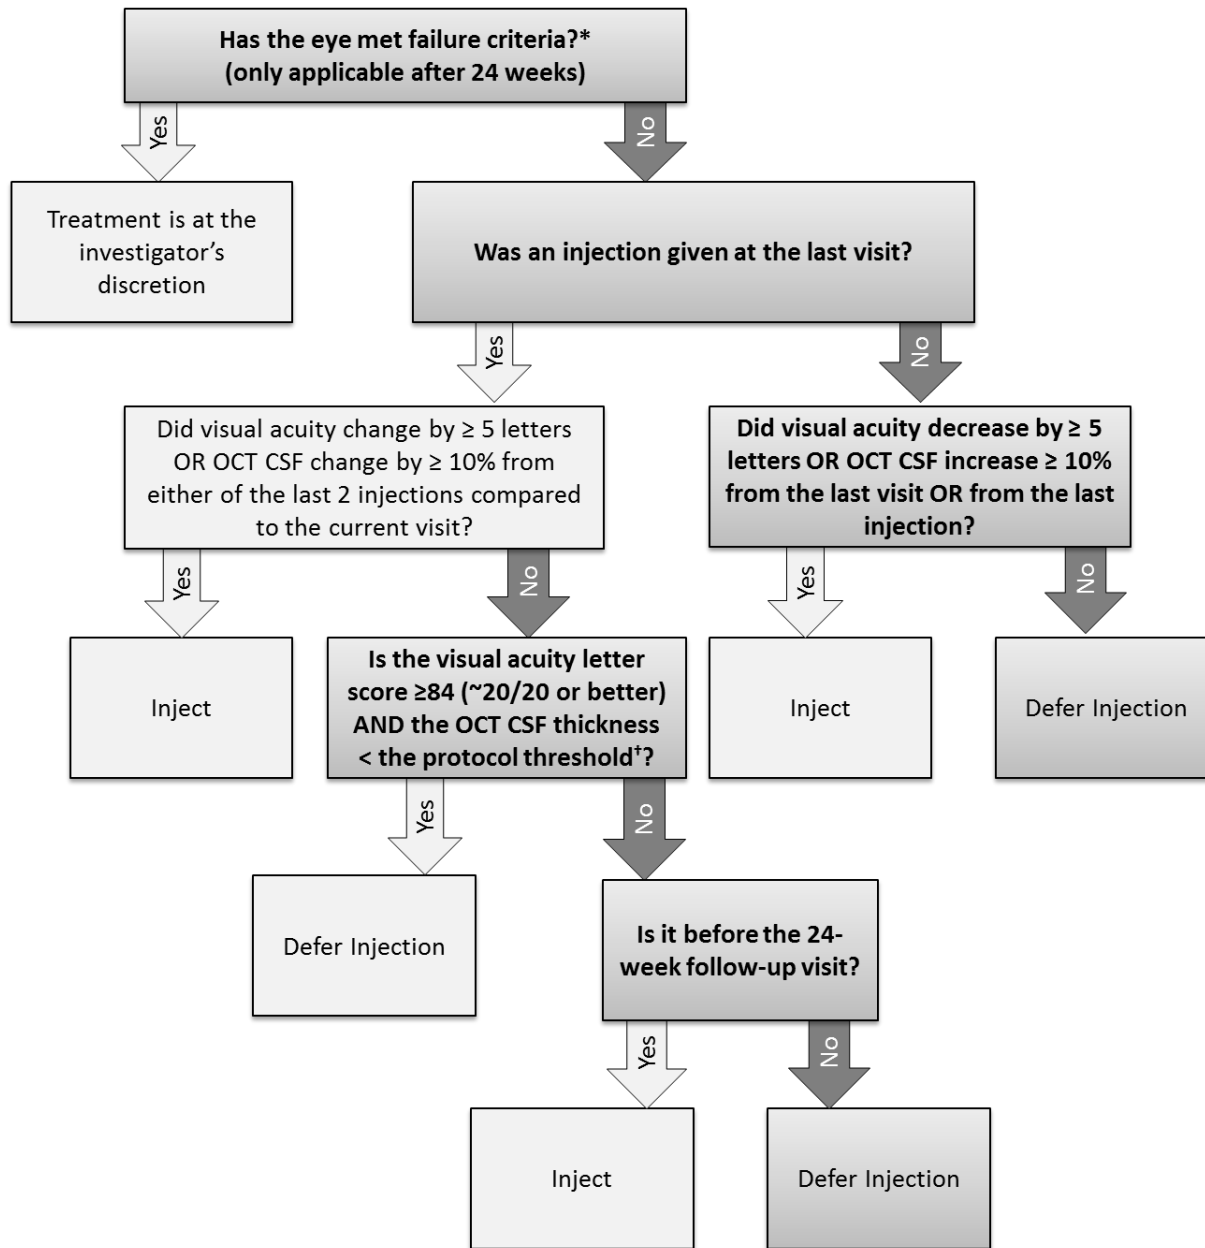

OCT = optical coherence tomography, CSF = central subfield, DME = diabetic macular edema  
 \*Failure = failure can only be met at or after the 24-week visit IF each of the following are met: A) OCT CSF thickness  $\geq$  eligibility threshold B) visual acuity is 10 or more letters worse than baseline at 2 consecutive visits, C) DME present on clinical exam that the investigator believes is the cause of the visual acuity loss, D) complete focal/grid laser for DME has been given, E) there has been no improvement in visual acuity ( $>5$  letters) or OCT ( $>10\%$  OCT CSF thickness) since either of the last two injections, F) there has been no improvement in visual acuity ( $>5$  letters) or OCT ( $>10\%$  OCT CSF thickness) since the last focal/grid laser treatment for DME was given, AND G) it has been  $\geq 13$  weeks since the last focal/grid laser treatment for DME.  
 †Protocol threshold =  $>250 \mu\text{m}$  on Zeiss Stratus;  $\geq 320$  for men or  $\geq 305$  for women on Heidelberg Spectralis;  $\geq 305$  for men or  $\geq 290$  for women on Zeiss Cirrus.



**Figure S1B. Initiating Focal/Grid Photocoagulation for Diabetic Macular Edema Treatment**

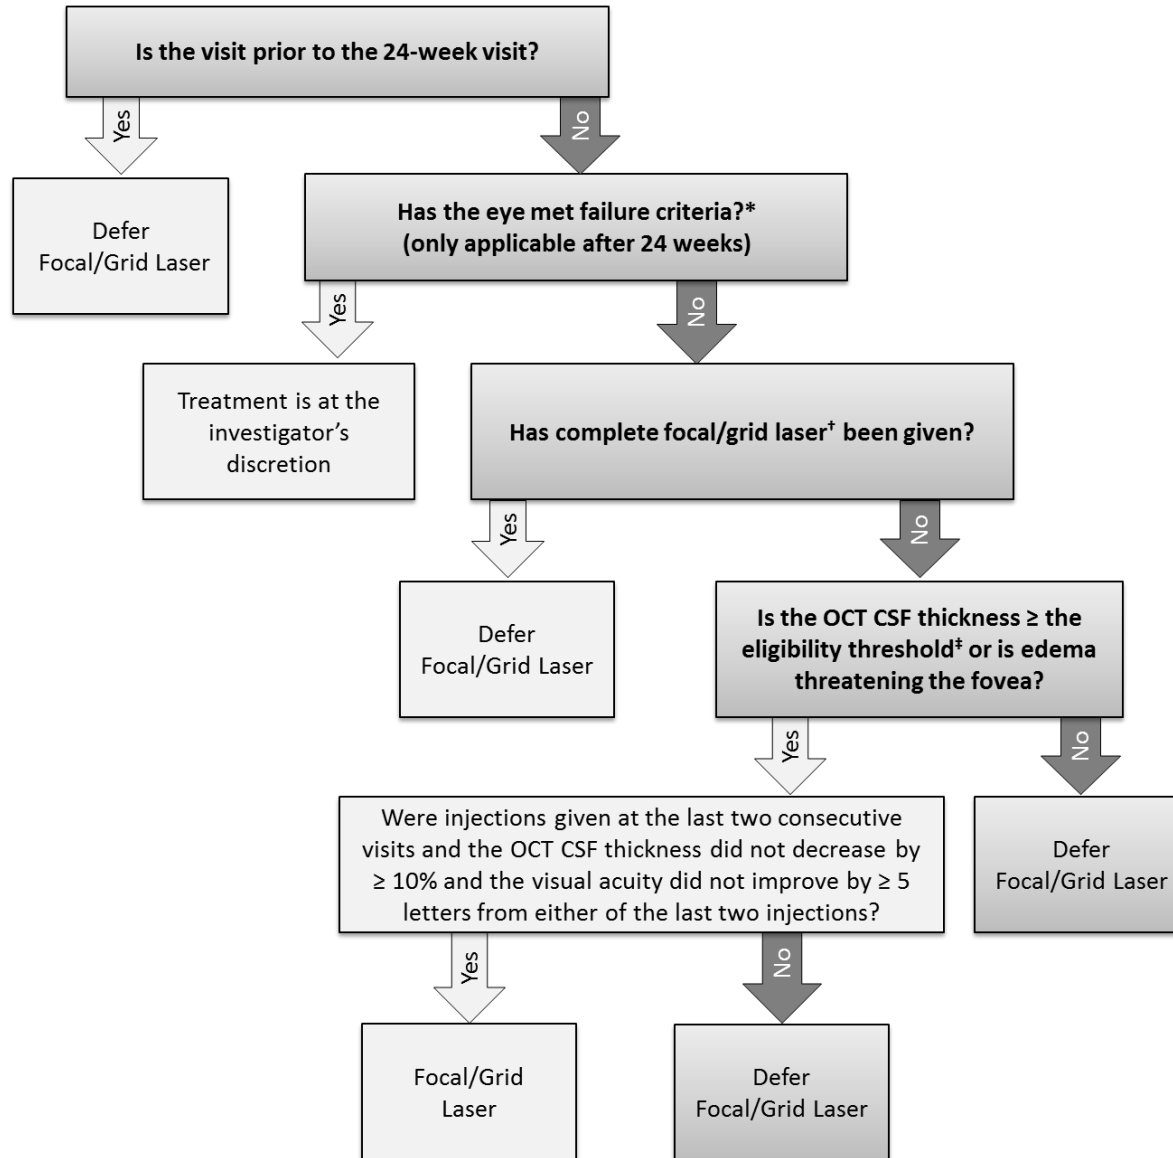

OCT = optical coherence tomography, CSF = central subfield, DME = diabetic macular edema

\*Failure = can only be met at or after the 24-week visit IF each of the following are met: A) OCT CSF thickness  $\geq$  the eligibility threshold, B) visual acuity is 10 or more letters worse than baseline at 2 consecutive visits, C) DME present on clinical examination that the investigator believes is the cause of the visual acuity loss, D) complete focal/grid laser for DME has been given, E) there has been no improvement in visual acuity ( $\geq 5$  letters) or OCT ( $\geq 10\%$  OCT CSF thickness) since either of the last two injections, F) there has been no improvement in visual acuity ( $> 5$  letters) or OCT ( $> 10\%$  OCT CSF thickness) since the last focal/grid laser treatment for DME was given, AND G) it has been  $\geq 13$  weeks since the last laser treatment.

†Complete focal/grid laser for DME = A) Beyond 500  $\mu\text{m}$  of the foveal center all microaneurysms within areas of retinal thickening or contributing to the edema have been adequately and directly treated with laser burns directly over the microaneurysms AND all areas of current retinal thickening have been treated with laser burns, such that the laser burns are “on average” within 100  $\mu\text{m}$  of each other (range between 50 and 150 microns) in a grid pattern throughout the area of retinal thickening, OR B) The ONLY untreated microaneurysms are within 300 to 500  $\mu\text{m}$  of the foveal center with visual acuity better than 20/40 and the risks of additional focal/grid are judged to outweigh benefits OR the ONLY microaneurysms are within 300  $\mu\text{m}$  of the foveal center, AND all other areas of macular thickening beyond 500  $\mu\text{m}$  have been treated as described in A above.

‡Eligibility threshold =  $\geq 250$   $\mu\text{m}$  on Zeiss Stratus;  $\geq 320$  for men or  $\geq 305$  for women on Heidelberg Spectralis;  $\geq 305$  for men or  $\geq 290$  for women on Zeiss Cirrus

**Figure S1C. Re-Treatment with Focal/Grid Photocoagulation during Follow-up for Diabetic Macular Edema**

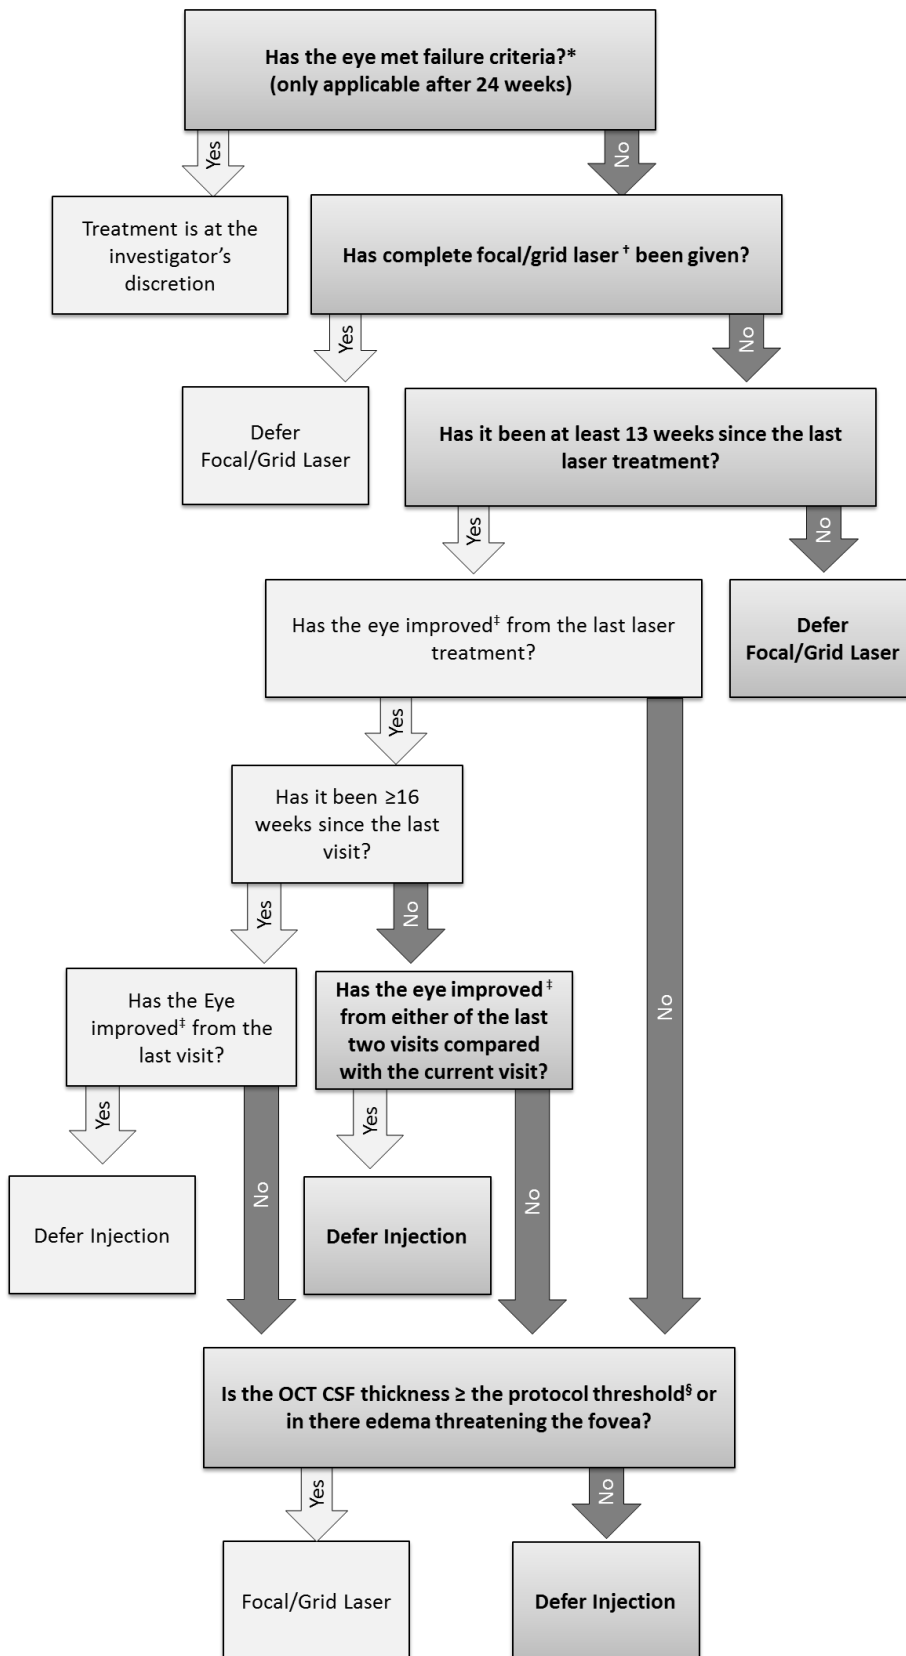

OCT = optical coherence tomography, CSF = central subfield

\*Failure = failure can only be met at or after the 24-week visit IF all of the following are met: A) OCT CSF thickness  $\geq 250 \mu\text{m}$  on Zeiss Stratus;  $\geq 320$  for men or  $\geq 305$  for women on Heidelberg Spectralis;  $\geq 305$  for men or  $\geq 290$  for women on Zeiss Cirrus B) visual acuity is 10 or more letters worse than baseline at 2 consecutive visits, C) DME present of clinical exam that the investigator believes is the cause of the visual acuity loss, D) complete laser has been given, E) there has been no improvement since either of the last two injections, F) there has been no improvement since the last laser treatment was given, AND G) it has been  $\geq 13$  weeks since the last laser treatment.

†Complete focal/grid laser for DME = A) Beyond  $500 \mu\text{m}$  of the foveal center all microaneurysms within areas of retinal thickening or contributing to the edema have been adequately and directly treated with laser burns directly over the microaneurysms AND all areas of current retinal thickening have been treated with laser burns, such that the laser burns are "on average" within 100 microns of each other (range between 50 and 150 microns) in a grid pattern throughout the area of retinal thickening OR B). The ONLY untreated microaneurysms are within 300 to  $500 \mu\text{m}$  of the foveal center with visual acuity better than 20/40 and the risks of additional focal/grid are judged to outweigh benefits OR the ONLY microaneurysms are within  $300 \mu\text{m}$  of the foveal center, AND all other areas of macular thickening beyond  $500 \mu\text{m}$  have been treated as described in A above.

‡Improved = Optical coherence tomography central subfield thickness decreased by  $\geq 10$  or visual acuity letter score improved by  $\geq 5$

§Eligibility threshold =  $\geq 250 \mu\text{m}$  on Zeiss Stratus;  $\geq 320$  for men or  $\geq 305$  for women on Heidelberg Spectralis;  $\geq 305$  for men or  $\geq 290$  for women on Zeiss Cirrus.

**Figure S2. Completion of Follow-up for Study Eyes.\***

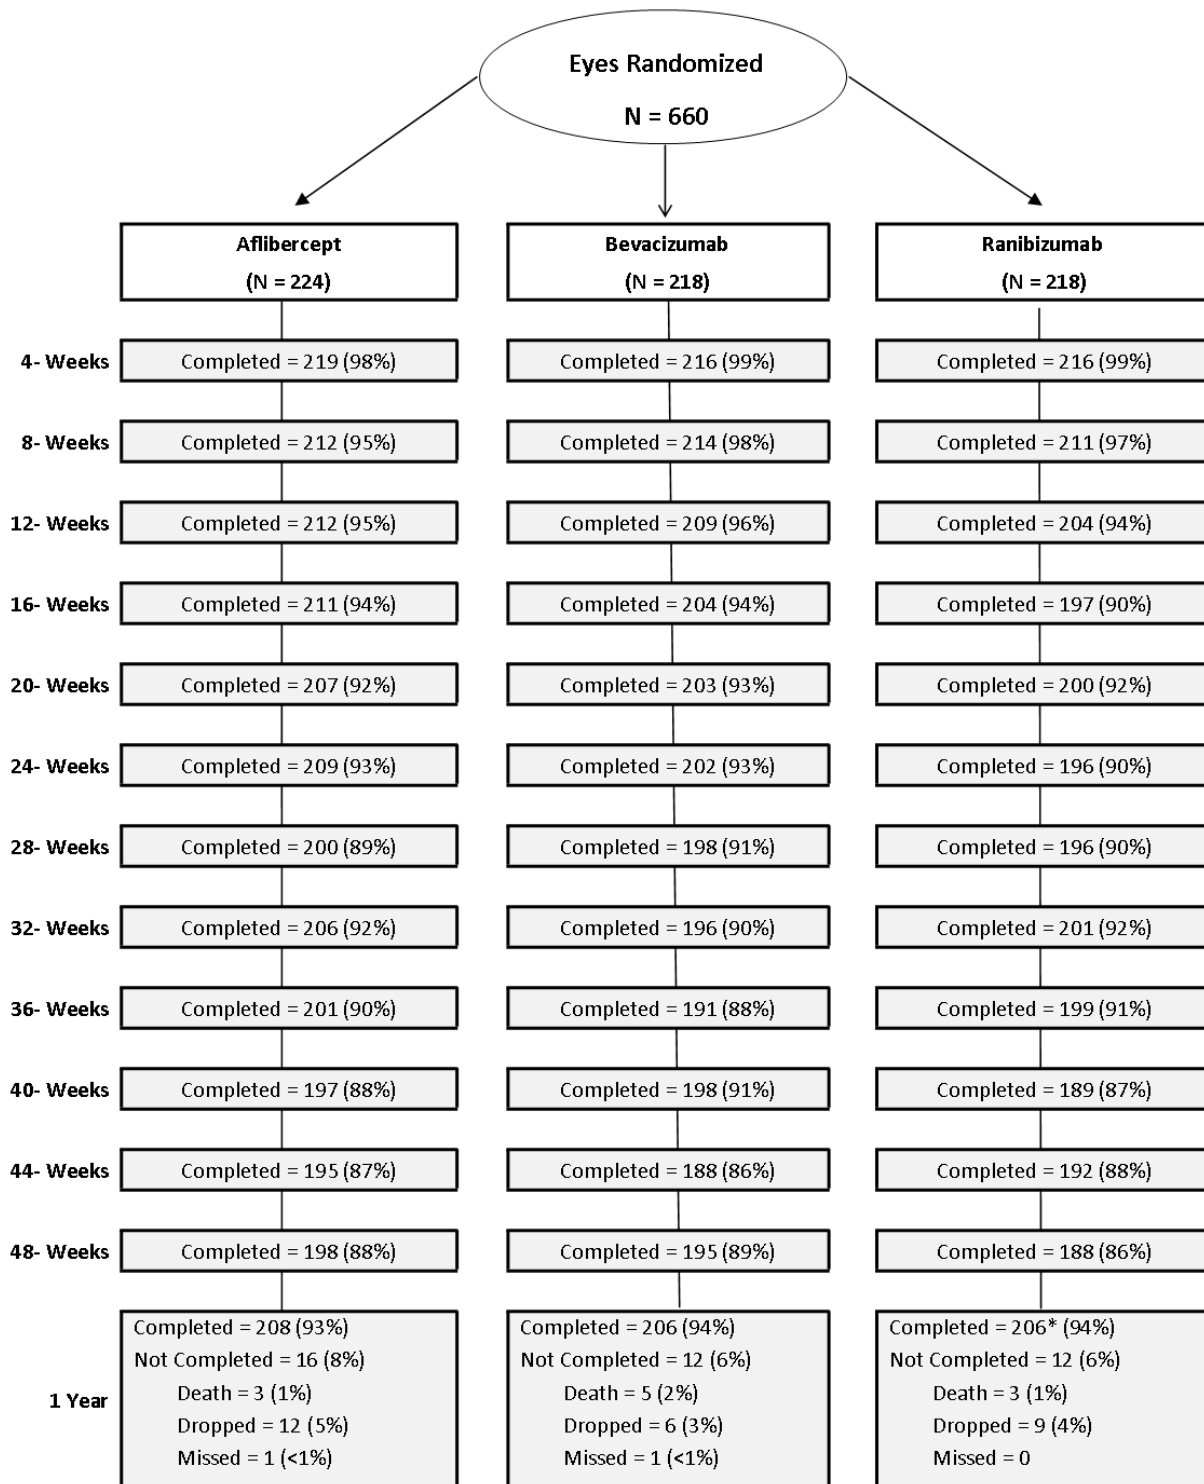

\*One-year completed visits include those that occurred between 308 and 420 days (between 44 and 60 weeks) from randomization. One death occurring after the 1 year visit but prior to 365 days is counted in the adverse event table but is not reflected in the flow chart.

**Figure S3. Change in Visual Acuity from Baseline to 1 Year by Treatment Group According to Baseline Visual Acuity**

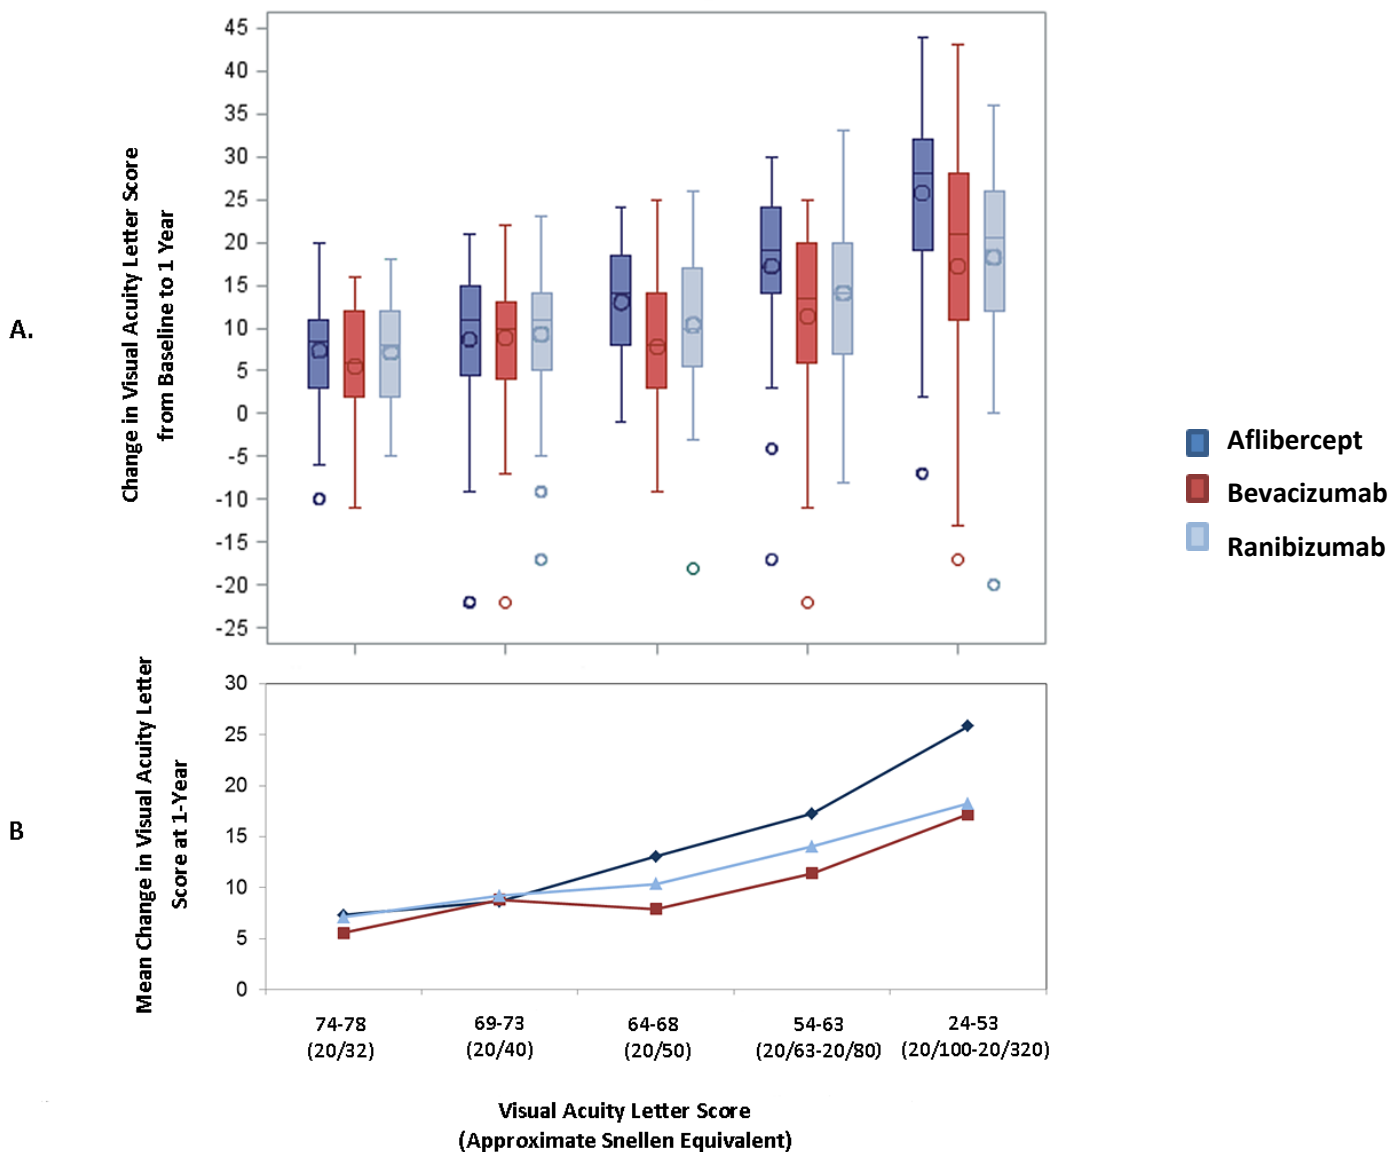

|             | Visual Acuity Letter Score<br>(Approximate Snellen Equivalent) |    |    |    |    |
|-------------|----------------------------------------------------------------|----|----|----|----|
|             | N* =                                                           |    |    |    |    |
| Aflibercept | 54                                                             | 52 | 36 | 29 | 37 |
| Bevacizumab | 41                                                             | 63 | 35 | 38 | 29 |
| Ranibizumab | 46                                                             | 59 | 32 | 37 | 32 |

\*Number of participants for figures A and B.

Change in visual acuity from baseline to 1 year, truncated to 3 standard deviations from the mean; stratified by baseline visual acuity. **Panel A:** Box plots showing distribution of 1-year change in visual acuities; the horizontal line represents the median, the circle represents the mean, the ends of the box represent the 25th and 75th percentiles, the lines extending from each bar represent values up to 1.5\*IQR, and the small circles represent outlier values beyond 1.5\*IQR. **Panel B:** Mean change in visual acuity at 1 year.

**Figure S4. Change in Visual Acuity Score from Baseline to Follow-up Visits**

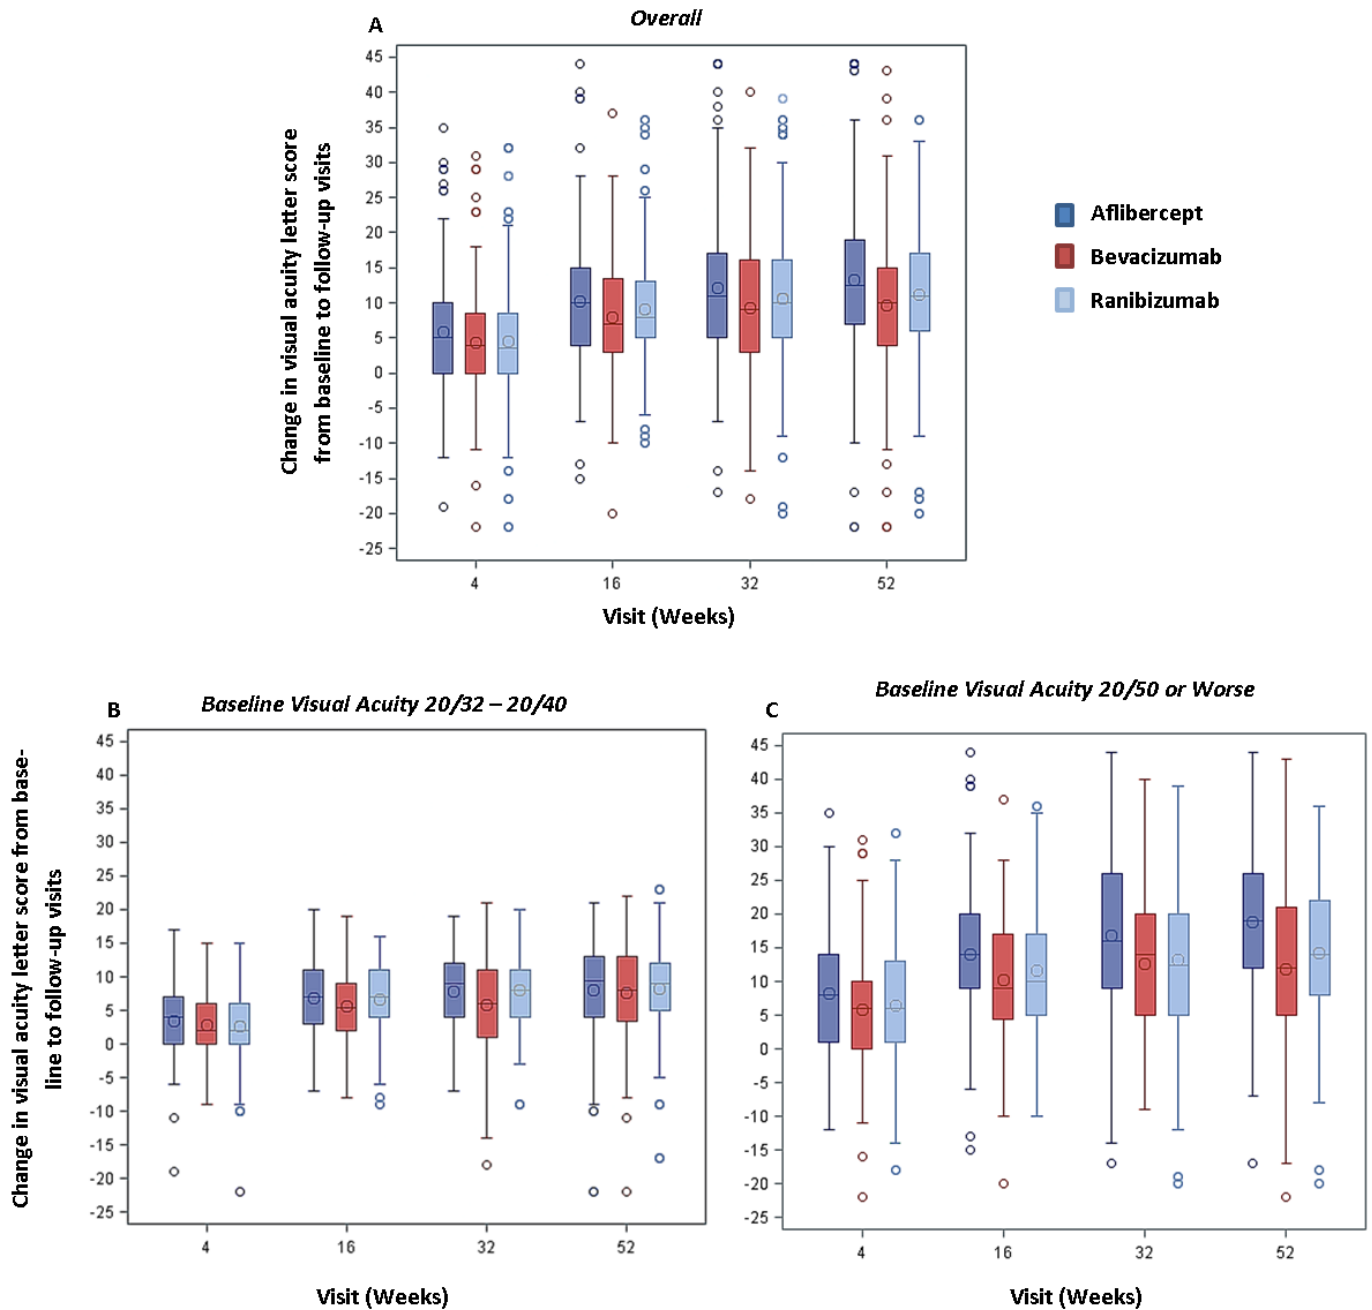

Box plots showing distribution of change in visual acuities from baseline to 4 weeks, 16 weeks, 32 weeks, and 1 year; the horizontal line represents the median, the circle represents the mean, the ends of the box represent the 25th and 75th percentiles, the lines extending from each bar represent values up to 1.5\*IQR, and the small circles represent outlier values beyond 1.5\*IQR. Change in visual acuity was truncated to 3 standard deviations from the mean. (Number at each 4-week visit [Figure S1]). **Panel A:** Overall, **Panel B:** baseline visual acuity (approximate Snellen equivalent): 20/32-20/40, **Panel C:** baseline visual acuity (approximate Snellen equivalent): 20/50 or worse.

**Table S1. Eligibility Criteria**

| <b><i>Participants</i></b> |                                                                                                                                                                                                                                                                                                                                                                                                                                                                                                                                                                                                                                                                                                                                                                                                                                                                                                                                                                                                                                                                                                                                                                                                                                                                                                             |
|----------------------------|-------------------------------------------------------------------------------------------------------------------------------------------------------------------------------------------------------------------------------------------------------------------------------------------------------------------------------------------------------------------------------------------------------------------------------------------------------------------------------------------------------------------------------------------------------------------------------------------------------------------------------------------------------------------------------------------------------------------------------------------------------------------------------------------------------------------------------------------------------------------------------------------------------------------------------------------------------------------------------------------------------------------------------------------------------------------------------------------------------------------------------------------------------------------------------------------------------------------------------------------------------------------------------------------------------------|
| <b>Inclusion</b>           | Age ≥ 18 years.<br>Diagnosis of type 1 or type 2 diabetes.                                                                                                                                                                                                                                                                                                                                                                                                                                                                                                                                                                                                                                                                                                                                                                                                                                                                                                                                                                                                                                                                                                                                                                                                                                                  |
| <b>Exclusion</b>           | Significant renal disease, defined as a history of chronic renal failure requiring dialysis or kidney transplant.<br>A condition that, in the opinion of the investigator, would preclude participation (e.g., unstable medical status including blood pressure, cardiovascular disease, and glycemic control).<br>Participation in an investigational trial within 30 days of randomization that involved treatment with any drug that has not received regulatory approval for the indication being studied at the time of study entry.<br>Known allergy to any component of the study drug.<br>Blood pressure > 180/110 (systolic above 180 OR diastolic above 110).<br>Myocardial infarction, other acute cardiac event requiring hospitalization, stroke, transient ischemic attack, or treatment for acute congestive heart failure within 4 months prior to randomization.<br>Systemic anti-VEGF or pro-VEGF treatment within four months prior to randomization or anticipated use during the study.<br>For women of child-bearing potential: pregnant or lactating or intending to become pregnant within the next 24 months.<br>Individual is expecting to move out of the area of the clinical center to an area not covered by another clinical center during the first 12 months of the study. |
| <b><i>Study Eye</i></b>    |                                                                                                                                                                                                                                                                                                                                                                                                                                                                                                                                                                                                                                                                                                                                                                                                                                                                                                                                                                                                                                                                                                                                                                                                                                                                                                             |
| <b>Inclusion</b>           | Best corrected E-ETDRS visual acuity letter score ≤ 78 (20/32 or worse) and ≥ 24 (20/320 or better).<br>Definite retinal thickening on clinical exam due to DME involving the center of the macula.<br>Media clarity, pupillary dilation, and individual cooperation sufficient for adequate fundus photographs.                                                                                                                                                                                                                                                                                                                                                                                                                                                                                                                                                                                                                                                                                                                                                                                                                                                                                                                                                                                            |
| <b>Exclusion</b>           | Central subfield thickness on OCT ≥250 μm on Zeiss Stratus; ≥320 if male or ≥305 if female on Heidelberg Spectralis; ≥305 if male or ≥290 if female on Zeiss Cirrus.<br>Macular edema is considered to be due to a cause other than DME.<br>An ocular condition is present such that, in the opinion of the investigator, visual acuity loss would not improve from resolution of macular edema (e.g., foveal atrophy, pigment abnormalities, dense subfoveal hard exudates, or non-retinal condition).                                                                                                                                                                                                                                                                                                                                                                                                                                                                                                                                                                                                                                                                                                                                                                                                     |

An ocular condition is present (other than diabetes) that might affect macular edema or alter visual acuity during the course of the study (e.g., vein occlusion, uveitis or other ocular inflammatory disease, neovascular glaucoma, etc.).

A substantial cataract is present that is likely to be decreasing visual acuity by three lines or more (i.e., cataract would be reducing acuity to 20/40 or worse if eye was otherwise normal).

History of an anti-VEGF treatment for DME in the past 12 months or history of any other treatment for DME at any time in the past four months (such as focal/grid macular photocoagulation, intravitreal or peribulbar corticosteroids).

History of panretinal photocoagulation within four months prior to randomization or anticipated need for pan-retinal photocoagulation in the six months following randomization.

History of anti-VEGF treatment for a disease other than DME in the past 12 months.

History of major ocular surgery (including vitrectomy, cataract extraction, scleral buckle, any intraocular surgery, etc.) within prior four months or anticipated within the next six months following randomization.

History of YAG capsulotomy performed within two months prior to randomization.

Aphakia

Exam evidence of external ocular infection, including conjunctivitis, chalazion, or significant blepharitis.

VEGF = vascular endothelial growth factor, E-ETDRS = Electronic- Early Treatment Diabetic Retinopathy Study, DME = diabetic macular edema, OCT = Optical coherence tomography

**Table S2. Study Bevacizumab Potency Testing Process and Results**

1. Between May 2012 and October 2014 the University of Pennsylvania, Investigational Drug Service produced six separate batches of repackaged bevacizumab used for this trial.
2. A sample of 20 vials from each batch was sent to an independent lab for potency testing. The contents of the vials were pooled for each batch for potency measurement.
3. The potency concentration from each of the 6 batches was: 25.1 mg/mL, 26.4 mg/mL, 24.8 mg/mL, 25.3 mg/mL, 25.2 mg/mL, and 25.0 mg/mL.
4. At the time of potency assessment for each batch, the independent testing lab also measured the potency of one unaltered commercially available vial of bevacizumab. The potency of this assessment was 25 mg/mL for each run. This value is consistent with the expected potency concentration based on prior publications.<sup>1</sup>



**Table S3. Visual Acuity at 1 Year: Sensitivity Analysis**

| Method Used                                                                                                                                                                                                                                                                                                                                        | P values adjusted for multiple comparisons<br>via Hochberg method <sup>2</sup> |                               |                               |
|----------------------------------------------------------------------------------------------------------------------------------------------------------------------------------------------------------------------------------------------------------------------------------------------------------------------------------------------------|--------------------------------------------------------------------------------|-------------------------------|-------------------------------|
|                                                                                                                                                                                                                                                                                                                                                    | Aflibercept vs<br>Bevacizumab                                                  | Aflibercept vs<br>Ranibizumab | Ranibizumab vs<br>Becavizumab |
| Primary Analysis: Markov chain Monte Carlo method of multiple imputation <sup>3</sup> (100 imputations) used to estimate missing 1 year change in visual acuity*                                                                                                                                                                                   | P<0.001                                                                        | P=0.034                       | P=0.12                        |
| Multiple imputation dataset used in primary analysis, adjusting for potential confounders (any prior DME treatment, age, baseline central subfield thickness, diabetes type, baseline lens status, and baseline Hemoglobin A1c)*                                                                                                                   | P<0.001                                                                        | P=0.031                       | P=0.17                        |
| Observed data only*                                                                                                                                                                                                                                                                                                                                | P<0.001                                                                        | P=0.037                       | P=0.065                       |
| Last observation carried forward method of imputation*                                                                                                                                                                                                                                                                                             | P=0.0016                                                                       | P=0.074                       | P=0.17                        |
| Observed data only; converting visual acuity change scores to normalized ranks (van der Waerden scores)*                                                                                                                                                                                                                                           | P<0.001                                                                        | P=0.037                       | P=0.037                       |
| Observed data only; Wilcoxon rank sum test                                                                                                                                                                                                                                                                                                         | P=0.0030                                                                       | P=0.12                        | P=0.13                        |
| Observed data only; per-protocol analysis excluding any eye receiving any alternative treatment for DME prior to 1 year visit* <sup>†</sup>                                                                                                                                                                                                        | P<0.001                                                                        | P=0.016                       | P=0.087                       |
| Observed data only; per-protocol analysis excluding any eye receiving any alternative treatment for DME prior to the 1 year visit or for which an injection deviation occurred (injection was deferred when required or injection was performed when it should have been deferred, based on protocol OCT and visual acuity criteria)* <sup>‡</sup> | P<0.001                                                                        | P=0.034                       | P=0.090                       |

DME = Diabetic macular edema

\*Treatment group comparisons of mean change from ANCOVA model adjusting for continuous baseline visual acuity.

<sup>†</sup>Two in the aflibercept group, 4 in the bevacizumab group, and 1 in the ranibizumab group.

<sup>‡</sup>Fifteen in the aflibercept group, 20 in the bevacizumab group, and 17 in the ranibizumab group.

| <b>Table S4. Visual Acuity Outcomes Overall</b> |                                       |                                       |                                       |                                                                                                         |                                   |                                  |
|-------------------------------------------------|---------------------------------------|---------------------------------------|---------------------------------------|---------------------------------------------------------------------------------------------------------|-----------------------------------|----------------------------------|
| <b>(Letter Score)</b>                           | <b>Observed Data</b>                  |                                       |                                       | <b>Treatment Group Comparisons</b>                                                                      |                                   |                                  |
|                                                 | <b>Aflibercept<br/>(N = 208)</b>      | <b>Bevacizumab<br/>(N = 206)</b>      | <b>Ranibizumab<br/>( N = 206)</b>     | <b>Differences in Mean Change or Difference in Proportions<br/>Adjusted 95% CI and Adjusted P Value</b> |                                   |                                  |
|                                                 | <b>Aflibercept vs<br/>Becavizumab</b> | <b>Aflibercept vs<br/>Ranibizumab</b> | <b>Ranibizumab vs<br/>Becavizumab</b> |                                                                                                         |                                   |                                  |
| <b>Baseline</b>                                 |                                       |                                       |                                       |                                                                                                         |                                   |                                  |
| Mean ± SD                                       | 65.0 ± 11.8                           | 64.8 ± 11.2                           | 65.1 ± 11.1                           |                                                                                                         |                                   |                                  |
| ~ Snellen equivalent                            | 20/50                                 | 20/50                                 | 20/50                                 |                                                                                                         |                                   |                                  |
| <b>1 Year</b>                                   |                                       |                                       |                                       |                                                                                                         |                                   |                                  |
| Mean ± SD                                       | 78.4 ± 10.1                           | 74.2 ± 13.2                           | 76.3 ± 11.1                           |                                                                                                         |                                   |                                  |
| ~ Snellen equivalent                            | 20/32                                 | 20/32                                 | 20/32                                 |                                                                                                         |                                   |                                  |
| <b>Change from baseline (letter score)</b>      |                                       |                                       |                                       |                                                                                                         |                                   |                                  |
| Mean ± SD                                       | +13.3 ± 11.1                          | +9.7 ± 10.1                           | +11.2 ± 9.4                           | +3.5<br>(+1.4 to +5.7)<br>P<0.001                                                                       | +2.1<br>(+0.1 to +4.2)<br>P=0.034 | +1.4<br>(-0.4 to +3.2)<br>P=0.12 |
| ≥ 10 letter improvement                         | 132 (63%)                             | 108 (52%)                             | 122 (59%)                             | +13%<br>(+1% to +24%)<br>P=0.021                                                                        | +4%<br>(-3% to +12%)<br>P=0.25    | +8%<br>(-2% to +19%)<br>P=0.15   |
| ≥ 10 letters worsening                          | 5 (2%)                                | 6 (3%)                                | 3 (1%)                                | 0<br>(-3% to +3%)<br>P=0.83                                                                             | +1%<br>(-2% to +4%)<br>P=0.83     | -1%<br>(-4% to +2%)<br>P=0.83    |
| ≥ 15 letter improvement                         | 87 (42%)                              | 59 (29%)                              | 66 (32%)                              | +11%<br>(+1% to +21%)<br>P=0.028                                                                        | +8%<br>(0% to +17%)<br>P=0.068    | +3%<br>(-5% to +11%)<br>P=0.51   |
| ≥ 15 letters worsening                          | 3 (1%)                                | 3 (1%)                                | 3 (1%)                                | 0%<br>(-2% to +2%)<br>P=0.98                                                                            | 0%<br>(-2% to +2%)<br>P=0.98      | 0%<br>(-2% to +2%)<br>P=0.98     |

Treatment group comparisons are from ANCOVA models adjusted for continuous baseline visual acuity or from binomial regression models adjusted for categorical baseline visual acuity. Reported P-values have been adjusted for multiple treatment group comparisons to account for an overall Type 1 error rate of 0.049 (see Hochberg for computation of the Hochberg-adjusted P-values<sup>2</sup>) and corresponding  $(1-\alpha/i)*100\%$  confidence intervals were reported, where  $i$  is the rank (1, 2, or 3) of the Hochberg-adjusted P-value from among the descending ordered raw pairwise P-values. This could result in identical P-values for all three pairwise comparisons.

Tests for treatment group interaction with baseline visual acuity from ANCOVA model for mean change in visual acuity adjusted for baseline visual acuity (using the multiple imputation datasets and computing the P-value associated with the average of the F statistics from each imputed dataset):

- P-value for interaction, treating baseline visual acuity as continuous = <0.001
- P-value for interaction, treating baseline visual acuity as categorical (<69 versus  $\geq 69$ ) = 0.0016

Visual acuity change truncated to +/- 3SD (-22 and +44) to minimize the effects of outliers for 6 eyes in the aflibercept group (4 on the positive end, 2 on the negative end) and 2 eyes in the bevacizumab group (both on the negative end).

One-year visit data unavailable for 16 eyes in the aflibercept group, 12 eyes in the bevacizumab group, and 12 eyes in the ranibizumab group. Descriptive statistics were based on observed data; Markov chain Monte Carlo multiple imputation<sup>3</sup> (100 imputations) was used to estimate the missing 1 year change in visual acuity for the treatment group comparisons (including tests for interaction).

**Table S5. Optical Coherence Tomography Central Subfield Thickness Outcomes Overall**

|                                                 | Observed Data            |                          |                          | Treatment Group Comparisons<br>Differences in Mean Change or Difference in Proportions<br>Adjusted 95% CI and Adjusted P Value |                                  |                                   |
|-------------------------------------------------|--------------------------|--------------------------|--------------------------|--------------------------------------------------------------------------------------------------------------------------------|----------------------------------|-----------------------------------|
|                                                 | Aflibercept<br>(N = 205) | Bevacizumab<br>(N = 203) | Ranibizumab<br>(N = 201) | Aflibercept vs<br>Beveracizumab                                                                                                | Aflibercept vs<br>Ranibizumab    | Ranibizumab vs<br>Beveracizumab   |
| Baseline CSF ( $\mu\text{m}$ )<br>mean $\pm$ SD | 412 $\pm$ 133            | 414 $\pm$ 136            | 407 $\pm$ 122            |                                                                                                                                |                                  |                                   |
| CSF 1 year ( $\mu\text{m}$ )<br>mean $\pm$ SD   | 240 $\pm$ 70             | 311 $\pm$ 124            | 257 $\pm$ 88             |                                                                                                                                |                                  |                                   |
| CSF change from<br>baseline ( $\mu\text{m}$ )   |                          |                          |                          |                                                                                                                                |                                  |                                   |
| Mean $\pm$ SD                                   | -169 $\pm$ 138           | -101 $\pm$ 121           | -147 $\pm$ 134           | -69.9<br>(-91.1,-48.6)<br>P<0.001                                                                                              | -18.6<br>(-36.0,-1.2)<br>P=0.036 | -51.2<br>(-71.2,-31.3)<br>P<0.001 |
| CSF <250 $\mu\text{m}$                          | 135 (66%)                | 74 (36%)                 | 116 (58%)                | +31%<br>(+20%, +42%)<br>P<0.001                                                                                                | +7%<br>(-2%, +17%)<br>P=0.13     | +24%<br>(+13%, +35%)<br>P<0.001   |

SD = standard deviation; CSF= central subfield thickness

All baseline and 1-year optical coherence tomography (OCT) scans were graded by Duke Reading Center. In addition, a random sample of OCT images from other visits and images for which the investigator believed central grading was needed also were graded by Duke Reading Center.

In addition to participants missing the 1-year visit, 3 in the aflibercept group, 3 in the bevacizumab group, and 5 in the ranibizumab group had 1-year visits but unusable OCT data to compute change due to the scan being missing or ungradable at either baseline or 1 year.

Baseline CSF values were converted from the thickness value measured on a Spectralis or Cirrus OCT machine to a Stratus equivalent value for 583 scans. One-year CSF values were converted from a thickness value measured on a Spectralis or Cirrus OCT machine to a Stratus equivalent value for 604 scans. When calculating change in CSF thickness, measurements taken on the same machine at both visits were not converted, since the conversion equation slope is nearly 1 and the constant difference does not affect the change calculation. Therefore, change in CSF

thickness was calculated after converting either the baseline and/or follow-up thickness value from Spectralis or Cirrus to a Stratus equivalent value in 26 eyes.

Treatment group comparison results are from ANCOVA on observed data, adjusted for continuous baseline visual acuity and continuous baseline CSF or from Poisson regression models with robust variance estimation using identity link,<sup>4</sup> adjusted for categorical baseline visual acuity and categorical baseline CSF. Reported P-values have been adjusted for multiple treatment group comparisons to account for an overall Type 1 error rate of 0.049 (see Hochberg for computation of the Hochberg-adjusted P-values<sup>2</sup>) and corresponding  $(1-\alpha/i)*100\%$  confidence intervals were reported, where i is the rank (1, 2, or 3) of the Hochberg-adjusted P-value from among the descending ordered raw pairwise P-values. This could result in identical P-values for all three pairwise comparisons.

Tests for treatment group interaction with baseline visual acuity from ANCOVA model for mean change in visual acuity adjusted for baseline visual acuity and continuous baseline CSF:

- P-value for interaction, treating baseline visual acuity as continuous = <0.001.
- P-value for interaction, treating baseline visual acuity as categorical (<69 versus  $\geq 69$ ) = <0.001.

| <b>Table S6. Baseline Characteristics</b>                                                |                                  |                                  |                                  |
|------------------------------------------------------------------------------------------|----------------------------------|----------------------------------|----------------------------------|
|                                                                                          | <b>Aflibercept<br/>(N = 224)</b> | <b>Bevacizumab<br/>(N = 218)</b> | <b>Ranibizumab<br/>(N = 218)</b> |
| <b><i>Participant Characteristics</i></b>                                                |                                  |                                  |                                  |
| <b>Gender: Women - N (%)</b>                                                             | 110 (49%)                        | 103 (47%)                        | 94 (43%)                         |
| <b>Age (yrs) - Median (25<sup>th</sup>, 75<sup>th</sup> percentile)</b>                  | 61 (54, 66)                      | 63 (56, 68)                      | 59 (53, 67)                      |
| Mean (Standard Deviation)                                                                | 60 (10)                          | 62 (10)                          | 60 (11)                          |
| <b>Race/Ethnicity - N (%)</b>                                                            |                                  |                                  |                                  |
| White                                                                                    | 145 (65%)                        | 139 (64%)                        | 146 (67%)                        |
| Black/African-American                                                                   | 32 (14%)                         | 37 (17%)                         | 36 (17%)                         |
| Hispanic                                                                                 | 37 (17%)                         | 36 (17%)                         | 30 (14%)                         |
| Asian                                                                                    | 2 (<1%)                          | 2 (<1%)                          | 4 (2%)                           |
| Native Hawaiian/other Pacific Islander                                                   | 2 (<1%)                          | 2 (<1%)                          | 0                                |
| American Indian/Alaskan Native                                                           | 1 (<1%)                          | 0                                | 0                                |
| More than one race                                                                       | 4 (2%)                           | 1 (<1%)                          | 1 (<1%)                          |
| Unknown/not reported                                                                     | 1 (<1%)                          | 1 (<1%)                          | 1 (<1%)                          |
| <b>Diabetes Type - N (%)</b>                                                             |                                  |                                  |                                  |
| Type 1                                                                                   | 22 (10%)                         | 12 (6%)                          | 16 (7%)                          |
| Type 2                                                                                   | 196 (88%)                        | 205 (94%)                        | 196 (90%)                        |
| Uncertain                                                                                | 6 (3%)                           | 1 (<1%)                          | 6 (3%)                           |
| <b>Duration of Diabetes (yrs) - Median (25<sup>th</sup>, 75<sup>th</sup> percentile)</b> | 15 (8, 21)                       | 17 (11, 24)                      | 16 (11, 23)                      |
| <b>Hemoglobin A1c (%) - Median (25<sup>th</sup>, 75<sup>th</sup> percentile)*</b>        | 7.6 (6.8, 9.1)                   | 7.7 (6.8, 8.8)                   | 7.8 (6.9, 9.2)                   |
| <b>Prior Myocardial Infarction - N (%)</b>                                               | 13 (6%)                          | 14 (6%)                          | 16 (7%)                          |
| <b>Prior Coronary Artery Disease (without myocardial infarction) - N (%)</b>             | 22 (10%)                         | 27 (12%)                         | 34 (16%)                         |

|                                                                                                               |                         |                         |                         |
|---------------------------------------------------------------------------------------------------------------|-------------------------|-------------------------|-------------------------|
| <b>Prior Stroke - N (%)</b>                                                                                   | 8 (4%)                  | 13 (6%)                 | 10 (5%)                 |
| <b>Prior Transient Ischemic Attacks - N (%)</b>                                                               | 6 (3%)                  | 8 (4%)                  | 10 (5%)                 |
| <b>Prior Gastrointestinal Perforation - N (%)</b>                                                             | 0                       | 2 (<1%)                 | 0                       |
| <b>Prior Renal Disease - N (%)</b>                                                                            | 20 (9%)                 | 26 (12%)                | 26 (12%)                |
| <b>Prior Hypertension - N (%)</b>                                                                             | 177 (79%)               | 181 (83%)               | 175 (80%)               |
| <b>Prior Severe Hemorrhage<sup>†</sup> - N (%)</b>                                                            | 3 (1%)                  | 3 (1%)                  | 0                       |
| <b>Mean Arterial Blood Pressure<sup>‡</sup> (mmHg) - Median (25<sup>th</sup>, 75<sup>th</sup> percentile)</b> | 101 (91, 112)           | 101 (91, 109)           | 102 (94, 112)           |
| <b>Albumin/Creatinine Ratio (mg/g)<sup>§</sup> - Median (25<sup>th</sup>, 75<sup>th</sup> percentile)</b>     | 69 (14, 548)            | 68 (16, 660)            | 61 (13, 777)            |
| <b>Smoke cigarettes on a daily basis - N (%)</b>                                                              |                         |                         |                         |
| Never                                                                                                         | 143 (64%)               | 132 (61%)               | 145 (67%)               |
| Prior                                                                                                         | 66 (29%)                | 73 (33%)                | 53 (24%)                |
| Current                                                                                                       | 15 (7%)                 | 13 (6%)                 | 20 (9%)                 |
| <b>Body Mass Index<sup>  </sup> (kg/m<sup>2</sup>) - Median (25<sup>th</sup>, 75<sup>th</sup> percentile)</b> | 31.8<br>(27.4, 37.3)    | 32.9<br>(28.7, 37.6)    | 32.3<br>(28.2, 37.2)    |
| <b><i>Ocular Characteristics</i></b>                                                                          |                         |                         |                         |
| <b>Visual Acuity</b>                                                                                          |                         |                         |                         |
| <b>Letter Score - Median (75<sup>th</sup>, 25<sup>th</sup> percentile)</b>                                    | 69 (74, 59)             | 69 (72, 60)             | 68 (73, 58)             |
| <b>~ Snellen Equivalent - Median (75<sup>th</sup>, 25<sup>th</sup> percentile)</b>                            | 20/40<br>(20/32, 20/63) | 20/40<br>(20/40, 20/63) | 20/50<br>(20/40, 20/80) |
| <b>20/50 or Worse (Letter Score &lt;69) - N (%)</b>                                                           | 112 (50%)               | 107 (49%)               | 110 (50%)               |
| <b>20/32-20/40 (Letter Score 78- 69) - N (%)</b>                                                              | 112 (50%)               | 111 (51%)               | 108 (50%)               |

|                                                                                                                           |                 |                 |                |
|---------------------------------------------------------------------------------------------------------------------------|-----------------|-----------------|----------------|
| <b>OCT Central Subfield (<math>\mu\text{m}</math>)<sup>†</sup> - Median (25<sup>th</sup>, 75<sup>th</sup> percentile)</b> | 387 (310, 483)  | 376 (305, 477)  | 390 (310, 493) |
| <b>OCT Retinal Volume (<math>\text{mm}^3</math>)<sup>††</sup> - Median (25<sup>th</sup>, 75<sup>th</sup> percentile)</b>  | 8.5 (7.7, 10.2) | 8.4 (7.4, 10.0) | 8.8 (7.7, 9.8) |
| <b>Lens Status (clinical exam) - N (%)</b>                                                                                |                 |                 |                |
| Phakic                                                                                                                    | 166 (74%)       | 160 (73%)       | 173 (79%)      |
| Pseudophakic                                                                                                              | 58 (26%)        | 58 (27%)        | 45 (21%)       |
| <b>Diabetic Retinopathy Severity<sup>††</sup> (ETDRS level)</b>                                                           |                 |                 |                |
| Absent or minimal NPDR (level 10-20)                                                                                      | 7 (3%)          | 6 (3%)          | 5 (2%)         |
| Mild to moderately severe NPDR (level 35, 43, 47)                                                                         | 150 (68%)       | 131 (62%)       | 145 (67%)      |
| Severe NPDR (level 53)                                                                                                    | 17 (8%)         | 15 (7%)         | 18 (8%)        |
| Prior PRP; without current PDR (level 60)                                                                                 | 17 (8%)         | 21 (10%)        | 16 (7%)        |
| Mild to moderate PDR (level 61 and 65)                                                                                    | 28 (13%)        | 31 (15%)        | 23 (11%)       |
| High risk PDR (level 71 and 75)                                                                                           | 2 (1%)          | 7 (3%)          | 9 (4%)         |
| <b>Prior Focal/Grid Laser for DME - N (%)</b>                                                                             | 80 (36%)        | 84 (39%)        | 80 (37%)       |
| <b>Prior Anti-VEGF for DME - N (%)</b>                                                                                    | 24 (11%)        | 31 (14%)        | 29 (13%)       |
| <b>Prior Other Treatment for DME<sup>**</sup> - N (%)</b>                                                                 | 14 (6%)         | 12 (6%)         | 11 (5%)        |
| <b>Prior PRP - N (%)</b>                                                                                                  | 32 (14%)        | 40 (18%)        | 35 (16%)       |
| <b>Intraocular Pressure (mmHg) - Median (25<sup>th</sup>, 75<sup>th</sup> percentile)</b>                                 | 15 (13, 18)     | 15 (14, 18)     | 16 (14, 18)    |



OCT = optical coherence tomography, ETDRS = early treatment diabetic retinopathy, NPDR = non-proliferative diabetic retinopathy, PRP = panretinal photocoagulation, PDR = proliferative diabetic retinopathy, DME = diabetic macular edema

\*Missing Hemoglobin A1c data: aflibercept (5) and ranibizumab (1).

†Severe hemorrhage includes hemoptysis, epistaxis, gastrointestinal bleeding, or vaginal bleeding.

‡Each participant value was a result of 3 sets of measurements yielding 3 mean arterial blood pressure values [diastolic + 1/3(systolic-diastolic)] averaged together for a single participant value.

§Missing Albumin/Creatinine data: aflibercept (3), bevacizumab (1), ranibizumab (2).

||Missing body mass index data: aflibercept (17), bevacizumab (22), and ranibizumab (23).

¶Missing OCT central subfield thickness measurements: aflibercept (3), bevacizumab (2), ranibizumab (3).

†† Missing OCT retinal volume measurements: aflibercept (40), bevacizumab (35), and ranibizumab (36).

‡‡ Missing diabetic retinopathy severity: aflibercept (3), bevacizumab (7), and ranibizumab (2).

\*\* Includes prior treatment with intravitreal corticosteroid, peribulbar corticosteroid or vitrectomy.

**Table S7. Treatment for Diabetic Macular Edema Prior to the 1 Year Visit**

|                                                                                                                  | Aflibercept<br>(N = 208) | Bevacizumab<br>(N = 206) | Ranibizumab<br>(N = 206*) | P-Value            |
|------------------------------------------------------------------------------------------------------------------|--------------------------|--------------------------|---------------------------|--------------------|
| <b><i>Intravitreal Injection</i></b>                                                                             |                          |                          |                           |                    |
| <b>Total Number of Injections Prior to 1 Year<sup>†</sup> (Maximum = 13) - N (%)</b>                             |                          |                          |                           |                    |
| 0-2                                                                                                              | 0                        | 0                        | 0                         |                    |
| 3                                                                                                                | 0                        | 1 (<1%)                  | 0                         |                    |
| 4                                                                                                                | 3 (1%)                   | 2 (1%)                   | 3 (1%)                    |                    |
| 5                                                                                                                | 4 (2%)                   | 3 (1%)                   | 3 (1%)                    |                    |
| 6                                                                                                                | 17 (8%)                  | 19 (9%)                  | 16 (8%)                   |                    |
| 7                                                                                                                | 23 (11%)                 | 21 (10%)                 | 21 (10%)                  |                    |
| 8                                                                                                                | 24 (12%)                 | 16 (8%)                  | 26 (13%)                  |                    |
| 9                                                                                                                | 45 (22%)                 | 27 (13%)                 | 27 (13%)                  |                    |
| 10                                                                                                               | 27 (13%)                 | 31 (15%)                 | 37 (18%)                  |                    |
| 11                                                                                                               | 40 (19%)                 | 31 (15%)                 | 34 (17%)                  |                    |
| 12                                                                                                               | 17 (8%)                  | 33 (16%)                 | 29 (14%)                  |                    |
| 13                                                                                                               | 8 (4%)                   | 22 (11%)                 | 10 (5%)                   |                    |
| Mean (Standard Deviation)                                                                                        | 9.2 (2.0)                | 9.7 (2.3)                | 9.4 (2.1)                 |                    |
| Median (25 <sup>th</sup> , 75 <sup>th</sup> percentile)                                                          | 9 (8, 11)                | 10 (8, 12)               | 10 (8, 11)                | 0.045 <sup>‡</sup> |
| <b>All visits, prior to 1 year - N (%)</b>                                                                       | <b>N = 2693</b>          | <b>N = 2631</b>          | <b>N = 2607</b>           |                    |
| Visits with injections received                                                                                  | 1991 (74%)               | 2055 (78%)               | 2011 (77%)                |                    |
| <i>Visits with injections deferred due to;</i>                                                                   |                          |                          |                           |                    |
| success                                                                                                          | 63 (2%)                  | 15 (1%)                  | 63 (2%)                   |                    |
| stability                                                                                                        | 606 (23%)                | 527 (20%)                | 509 (20%)                 |                    |
| failure                                                                                                          | 2 (<1%)                  | 5 (<1%)                  | 0                         |                    |
| other reasons                                                                                                    | 31 (1%)                  | 29 (1%)                  | 24 (1%)                   |                    |
| <b>Follow-up Visits Requiring Re-<br/>Injection Per Protocol based on OCT<br/>and visual acuity criteria - N</b> | <b>N = 1780</b>          | <b>N = 1854</b>          | <b>N = 1805</b>           |                    |
| Injection Not Given - N (%)                                                                                      | 15 (1%)                  | 21 (1%)                  | 16 (1%)                   |                    |
| <i>Reasons</i>                                                                                                   |                          |                          |                           |                    |
| Adverse event precluding<br>treatment                                                                            | 6                        | 9                        | 9                         |                    |
| Subject refused                                                                                                  | 1                        | 4                        | 2                         |                    |
| Treatment not needed per<br>investigator                                                                         | 6                        | 3                        | 3                         |                    |
| Other                                                                                                            | 2                        | 5                        | 2                         |                    |
| <b>Injection Received when Protocol<br/>Indicated Deferral</b>                                                   | 1                        | 4                        | 4                         |                    |

| <b>Laser Photocoagulation</b>                                                                                                                                |              |              |               |                     |
|--------------------------------------------------------------------------------------------------------------------------------------------------------------|--------------|--------------|---------------|---------------------|
| <b>Total Number of Focal/Grid Laser Treatments Prior to 24 Weeks</b>                                                                                         | 0            | 0            | 0             |                     |
| <b>Total Number of Laser Treatments Between 24 weeks and 1 Year<sup>†</sup> - N (%)</b>                                                                      |              |              |               |                     |
| 0                                                                                                                                                            | 132 (63%)    | 91 (44%)     | 111 (54%)     | <0.001 <sup>§</sup> |
| 1                                                                                                                                                            | 57 (27%)     | 85 (41%)     | 77 (37%)      |                     |
| 2                                                                                                                                                            | 19 (9%)      | 30 (15%)     | 18 (9%)       |                     |
| <b>Eyes for which focal/grid laser was indicated per visual acuity or OCT protocol criteria at 1 or more visit but not performed prior to 1 year - N (%)</b> | 15 (7%)      | 17 (8%)      | 10 (5%)       |                     |
| <b>Other</b>                                                                                                                                                 |              |              |               |                     |
| <b>Eyes receiving 1 or more alternative treatments for DME other than laser - N (%) / Number of those eyes meeting failure criteria</b>                      | 2 (1%) / (1) | 4 (2%) / (2) | 1 (<1%) / (0) |                     |

OCT = optical coherence tomography, DME = diabetic macular edema

\*Seven study eyes received 1 injection and 2 eyes received 2 injections of 0.5 mg of ranibizumab prior to the FDA approving a 0.3mg dosage of ranibizumab for DME treatment.

†Only includes participants that completed the 1 year visit.

‡Global (overall 3 group comparison) P-value from Kruskal-Wallis Test. Pairwise comparisons from Wilcoxon Rank Sum Test (adjusted for multiple comparisons by taking the maximum of the global and pairwise comparison P-values): aflibercept-bevacizumab: P=0.045, aflibercept-ranibizumab: P=0.19, bevacizumab-ranibizumab: P=0.22.

§Global (overall 3 group comparison) P-value from Fisher's Exact Test for proportion with no laser versus any laser prior to 1 year. Pairwise comparisons from Fisher's Exact Test (adjusted for multiple comparisons by taking the maximum of the global and pairwise comparison P-values): aflibercept-bevacizumab: P=<0.001, aflibercept-ranibizumab: P=0.058, bevacizumab-ranibizumab: P=0.061.

| <b>Table S8. Change in Visual Acuity Letter Score from Baseline to 1 Year: Additional Pre-Planned Subgroup Analyses</b> |                    |                  |                    |                  |                    |                  |                                                         |
|-------------------------------------------------------------------------------------------------------------------------|--------------------|------------------|--------------------|------------------|--------------------|------------------|---------------------------------------------------------|
|                                                                                                                         | <b>Aflibercept</b> |                  | <b>Bevacizumab</b> |                  | <b>Ranibizumab</b> |                  | <b>P Value for Interaction Categorical (Continuous)</b> |
|                                                                                                                         | <b>N</b>           | <b>Mean ± SD</b> | <b>N</b>           | <b>Mean ± SD</b> | <b>N</b>           | <b>Mean ± SD</b> |                                                         |
| <b>Baseline OCT Central Subfield Thickness</b>                                                                          |                    |                  |                    |                  |                    |                  | 0.012<br>(0.0049)                                       |
| < 400 µm                                                                                                                | 112                | +10.9 ± 10.1     | 112                | +9.5 ± 7.6       | 109                | +10.1 ± 9.5      |                                                         |
| ≥ 400 µm                                                                                                                | 93                 | +16.2 ± 11.7     | 91                 | +9.6 ± 11.7      | 93                 | +12.4 ± 9.0      |                                                         |
| <b>Any Prior Anti-VEGF Treatment</b>                                                                                    |                    |                  |                    |                  |                    |                  | 0.39                                                    |
| No                                                                                                                      | 185                | +13.7 ± 11.2     | 174                | +9.7 ± 10.5      | 178                | +11.9 ± 9.4      |                                                         |
| Yes                                                                                                                     | 23                 | +10.3 ± 10.5     | 32                 | +9.3 ± 8.2       | 28                 | +7.0 ± 8.1       |                                                         |
| <b>Lens Status</b>                                                                                                      |                    |                  |                    |                  |                    |                  | 0.90                                                    |
| Pseudophakic                                                                                                            | 53                 | +11.6 ± 11.1     | 57                 | +8.1 ± 11.2      | 43                 | +9.7 ± 9.0       |                                                         |
| Phakic                                                                                                                  | 155                | +13.9 ± 11.1     | 149                | +10.3 ± 9.6      | 163                | +11.6 ± 9.4      |                                                         |

SD = standard deviation, OCT= optical coherence tomography, VEGF= vascular endothelial growth factor

- Visual acuity change truncated to +/- 3SD.
- An additional preplanned hypothesis to look at prior vitrectomy subgroups did not have at least 10 eyes in each treatment group for each subgroup and was therefore not evaluated.
- Descriptive statistics were based on observed data; Markov chain Monte Carlo multiple imputation<sup>3</sup> (100 imputations) was used to estimate the missing 1 year change in visual acuity for the tests for interaction.
- Tests for treatment group interaction were from ANCOVA model for mean change in visual acuity adjusted for continuous baseline visual acuity (using the multiple imputation datasets and computing the *P*-value associated with the average of the *F* statistics from each imputed dataset).

**Table S9. Change in Retinal Volume from Baseline to 1 Year**

| <b>Overall</b>                                                     |                                  |                                  |                                  |
|--------------------------------------------------------------------|----------------------------------|----------------------------------|----------------------------------|
|                                                                    | <b>Aflibercept<br/>(N = 162)</b> | <b>Bevacizumab<br/>(N = 153)</b> | <b>Ranibizumab<br/>(N = 162)</b> |
| <b>Baseline Volume</b> - Mean ± SD                                 | 8.9 ± 1.9                        | 8.8 ± 1.8                        | 8.9 ± 1.7                        |
| <b>Volume at 1 Year</b> - Mean ± SD                                | 7.2 ± 0.9                        | 7.8 ± 1.4                        | 7.3 ± 1.0                        |
| <b>Change in Volume from Baseline</b> - Mean ± SD                  | -1.7 ± 1.6                       | -1.0 ± 1.2                       | -1.7 ± 1.5                       |
| <b>Baseline Visual Acuity 20/50 or Worse (Letter Score &lt;69)</b> |                                  |                                  |                                  |
|                                                                    | <b>Aflibercept<br/>(N = 79)</b>  | <b>Bevacizumab<br/>(N = 72)</b>  | <b>Ranibizumab<br/>(N = 72)</b>  |
| <b>Baseline Volume</b> - Mean ± SD                                 | 9.6±2.1                          | 9.3±2.0                          | 9.2±1.9                          |
| <b>Volume at 1 Year</b> - Mean ± SD                                | 7.3±1.0                          | 8.0±1.6                          | 7.2±1.2                          |
| <b>Change in Volume from Baseline</b> - Mean ± SD                  | -2.3±1.8                         | -1.3±1.4                         | -2.1±1.8                         |
| <b>Baseline Visual Acuity 20/32-20/40 (Letter Score 78-69)</b>     |                                  |                                  |                                  |
|                                                                    | <b>Aflibercept<br/>(N = 83)</b>  | <b>Bevacizumab<br/>(N = 81)</b>  | <b>Ranibizumab<br/>(N = 90)</b>  |
| <b>Baseline Volume</b> - Mean ± SD                                 | 8.4±1.3                          | 8.4 ± 1.5                        | 8.7±1.4                          |
| <b>Volume at 1 Year</b> - Mean ± SD                                | 7.2±0.7                          | 7.6±1.1                          | 7.4±0.9                          |
| <b>Change in Volume from Baseline</b> - Mean ± SD                  | -1.2±1.0                         | -0.8±0.9                         | -1.3±1.2                         |

- All baseline and 1-year optical coherence tomography (OCT) scans were graded by Duke Reading Center. In addition a random sample of OCT images from other visits and images for which the investigator believed central grading was needed also were graded by Duke Reading Center.
- In addition to participants missing the 1-year visit, 46 in the aflibercept group, 53 in the bevacizumab group, and 44 in the ranibizumab group had 1-year visits but unusable OCT data to compute change due to the scan being missing or ungradable at either baseline or 1 year.
- Baseline volume values were converted from the thickness value measured on a Spectralis or Cirrus OCT machine to a Stratus equivalent value for 459 scans. One-year volume values were converted from a thickness value measured on a Spectralis or Cirrus OCT machine to a Stratus equivalent value for 472 scans. When calculating change in volume, measurements taken on the same machine at both visits were not converted, because the conversion equation slope is nearly 1 and the constant difference does not affect the change calculation. Therefore, change in volume was calculated after converting either the baseline and/or follow-up value from Spectralis or Cirrus to a Stratus equivalent value in 17 eyes.

**Table S10. Systemic Adverse Events through 1 Year: Stratified by Whether Bilateral Study Drug was Received Prior to 1 Year**

| <b>Participants with Unilateral Study Anti-VEGF Treatment prior to 1 year *</b>                                                                                 |                                  |                                  |                                  |
|-----------------------------------------------------------------------------------------------------------------------------------------------------------------|----------------------------------|----------------------------------|----------------------------------|
|                                                                                                                                                                 | <b>Aflibercept<br/>(N = 95)</b>  | <b>Bevacizumab<br/>(N = 96)</b>  | <b>Ranibizumab<br/>(N = 97)</b>  |
| <b>Vascular Events According to the Antiplatelet Trialists' Collaboration<sup>5</sup> occurring at least once through 1 year<sup>†</sup> (No. Participants)</b> |                                  |                                  |                                  |
| Non-fatal myocardial infarction                                                                                                                                 | 3 (3%)                           | 0                                | 2 (2%)                           |
| Non-fatal stroke                                                                                                                                                | 0                                | 2 (2%)                           | 2 (2%)                           |
| Vascular death (from any potential vascular or unknown cause)                                                                                                   | 0                                | 4 (4%)                           | 1 (1%)                           |
| Any Antiplatelet Trialists' Collaboration Event                                                                                                                 | 3 (3%)                           | 6 (6%)                           | 5 (5%)                           |
| <b>Pre-specified Systemic Events occurring at least once through 1 year<sup>†</sup> (No. Participants)</b>                                                      |                                  |                                  |                                  |
| Death (any cause)                                                                                                                                               | 0                                | 5 (5%)                           | 2 (2%)                           |
| Hospitalization                                                                                                                                                 | 20 (21%)                         | 12 (13%)                         | 23 (24%)                         |
| Serious adverse event                                                                                                                                           | 24 (25%)                         | 16 (17%)                         | 25 (26%)                         |
| Gastrointestinal <sup>‡</sup>                                                                                                                                   | 17 (18%)                         | 11 (11%)                         | 18 (19%)                         |
| Kidney <sup>§</sup>                                                                                                                                             | 9 (9%)                           | 4 (4%)                           | 4 (4%)                           |
| Hypertension                                                                                                                                                    | 7 (7%)                           | 3 (3%)                           | 8 (8%)                           |
| <b>Participants with Bilateral Study Anti-VEGF Treatment prior to 1 year *</b>                                                                                  |                                  |                                  |                                  |
|                                                                                                                                                                 | <b>Aflibercept<br/>(N = 129)</b> | <b>Bevacizumab<br/>(N = 122)</b> | <b>Ranibizumab<br/>(N = 121)</b> |
| <b>Vascular Events According to the Antiplatelet Trialists' Collaboration<sup>5</sup> occurring at least once through 1 year<sup>†</sup> (No. Participants)</b> |                                  |                                  |                                  |
| Non-fatal myocardial infarction                                                                                                                                 | 1 (<1%)                          | 1 (<1%)                          | 1 (<1%)                          |
| Non-fatal stroke                                                                                                                                                | 0                                | 2 (2%)                           | 2 (2%)                           |
| Vascular death (from any potential vascular or unknown cause)                                                                                                   | 2 (2%)                           | 0                                | 2 (2%)                           |
| Any Antiplatelet Trialists' Collaboration Event                                                                                                                 | 3 (2%)                           | 3 (2%)                           | 5 (4%)                           |
| <b>Pre-specified Systemic Events occurring at least once through 1 year<sup>†</sup> (No. Participants)</b>                                                      |                                  |                                  |                                  |
| Death (any cause)                                                                                                                                               | 3 (2%)                           | 0                                | 2 (2%)                           |
| Hospitalization                                                                                                                                                 | 29 (22%)                         | 28 (23%)                         | 26 (21%)                         |
| Serious adverse event                                                                                                                                           | 35 (27%)                         | 30 (25%)                         | 30 (25%)                         |
| Gastrointestinal <sup>‡</sup>                                                                                                                                   | 27 (21%)                         | 29 (24%)                         | 20 (17%)                         |
| Kidney <sup>§</sup>                                                                                                                                             | 19 (15%)                         | 19 (16%)                         | 20 (17%)                         |
| Hypertension                                                                                                                                                    | 19 (15%)                         | 13 (11%)                         | 18 (15%)                         |

\*One-year visit (if the 1 year visit was not completed, then 365 days was used).

†One-year visit (if the 1 year visit was not completed or if it was completed prior to 365 days, then 365 days was used).

‡Includes events with a Medical Dictionary for Regulatory Activities system organ class of gastrointestinal disorder.

§Includes a subset of Medical Dictionary for Regulatory Activities system organ class of renal and urinary disorders events indicative of intrinsic kidney disease, plus increased/abnormal blood creatinine or renal transplant from other system organ classes.

**Table S11. Post Hoc Analysis: Events by Medical Dictionary for Regulatory Activities System Organ Class Through 1 Year**

|                                                                                                        | Aflibercept<br>(N = 224) | Bevacizumab<br>(N = 218) | Ranibizumab<br>(N = 218) | P<br>Value* |
|--------------------------------------------------------------------------------------------------------|--------------------------|--------------------------|--------------------------|-------------|
| <b><i>Number of Participants with an Event<br/>in the Given System Organ Class Through 1 year†</i></b> |                          |                          |                          |             |
| Blood and lymphatic system disorders                                                                   | 14 (6%)                  | 5 (2%)                   | 8 (4%)                   | 0.12        |
| Cardiac disorders                                                                                      | 14 (6%)                  | 11 (5%)                  | 23 (11%)                 | 0.081       |
| Ear and labyrinth disorders                                                                            | 6 (3%)                   | 4 (2%)                   | 1 (<1%)                  | 0.20        |
| Endocrine disorders                                                                                    | 28 (13%)                 | 22 (10%)                 | 25 (11%)                 | 0.73        |
| Eye disorders                                                                                          | 134 (60%)                | 141 (65%)                | 140 (64%)                | 0.52        |
| Gastrointestinal disorders                                                                             | 44 (20%)                 | 40 (18%)                 | 38 (17%)                 | 0.84        |
| General disorders and administration site conditions                                                   | 29 (13%)                 | 26 (12%)                 | 24 (11%)                 | 0.82        |
| Hepatobiliary disorders                                                                                | 1 (<1%)                  | 3 (1%)                   | 3 (1%)                   | 0.58        |
| Immune system disorders                                                                                | 12 (5%)                  | 11 (5%)                  | 10 (5%)                  | 0.97        |
| Infections and infestations                                                                            | 25 (11%)                 | 26 (12%)                 | 26 (12%)                 | 0.96        |
| Injury, poisoning and procedural complications                                                         | 18 (8%)                  | 19 (9%)                  | 19 (9%)                  | 0.95        |
| Investigations                                                                                         | 22 (10%)                 | 12 (6%)                  | 19 (9%)                  | 0.22        |
| Metabolism and nutrition disorders                                                                     | 29 (13%)                 | 17 (8%)                  | 23 (11%)                 | 0.21        |
| Musculoskeletal and connective tissue disorders                                                        | 55 (25%)                 | 57 (26%)                 | 53 (24%)                 | 0.91        |
| Neoplasms benign, malignant and unspecified (including cysts and polyps)                               | 1 (<1%)                  | 4 (2%)                   | 2 (<1%)                  | 0.32        |
| Nervous system disorders                                                                               | 43 (19%)                 | 43 (20%)                 | 50 (23%)                 | 0.58        |
| Psychiatric disorders                                                                                  | 12 (5%)                  | 12 (6%)                  | 14 (6%)                  | 0.91        |
| Renal and urinary disorders                                                                            | 41 (18%)                 | 36 (17%)                 | 32 (15%)                 | 0.60        |
| Reproductive system and breast disorders                                                               | 3 (1%)                   | 3 (1%)                   | 5 (2%)                   | 0.75        |
| Respiratory, thoracic and mediastinal disorders                                                        | 72 (32%)                 | 60 (28%)                 | 68 (31%)                 | 0.53        |
| Skin and subcutaneous tissue disorders                                                                 | 37 (17%)                 | 29 (13%)                 | 27 (12%)                 | 0.43        |
| Social circumstances                                                                                   | 0                        | 1 (<1%)                  | 0                        | 0.66        |
| Surgical and medical procedures                                                                        | 12 (5%)                  | 10 (5%)                  | 10 (5%)                  | 0.92        |
| Vascular disorders                                                                                     | 32 (14%)                 | 25 (11%)                 | 40 (18%)                 | 0.13        |

\*Global (overall 3 group comparison) P-value from Fisher's Exact Test.

†One-year visit (If the 1 year visit was not completed or if it was completed prior to 365 days, then 365 days was used.)



**Table S12. Post Hoc Analysis: Cardiovascular Events through 1 Year**

| <b>Overall</b>                                                                             |                              |                              |                              |                |
|--------------------------------------------------------------------------------------------|------------------------------|------------------------------|------------------------------|----------------|
| <b>Events occurring at least once through 1 year* (No. Participants)</b>                   | <b>Aflibercept (N = 224)</b> | <b>Bevacizumab (N = 218)</b> | <b>Ranibizumab (N = 218)</b> | <b>P Value</b> |
| Any Cardiovascular Event,† excluding Hypertension                                          | 20 (9%)                      | 19 (9%)                      | 37 (17%)                     | 0.012‡         |
| Any Cardiovascular Event†                                                                  | 42 (19%)                     | 35 (16%)                     | 56 (26%)                     | 0.038§         |
| Cardiac Events                                                                             | 14 (6%)                      | 12 (6%)                      | 23 (11%)                     |                |
| Cerebrovascular Events                                                                     | 0                            | 4 (2%)                       | 10 (5%)                      |                |
| Peripheral Vascular Disease Events                                                         | 1 (<1%)                      | 2 (<1%)                      | 2 (<1%)                      |                |
| Venous Disease Events                                                                      | 1 (<1%)                      | 2 (<1%)                      | 2 (<1%)                      |                |
| Hypertension Events                                                                        | 26 (12%)                     | 16 (7%)                      | 26 (12%)                     |                |
| Other Cardiovascular Events                                                                | 6 (3%)                       | 2 (<1%)                      | 4 (2%)                       |                |
| <b>Participants with Unilateral Study Anti-VEGF Treatment prior to 1 year<sup>  </sup></b> |                              |                              |                              |                |
| <b>Events occurring at least once through 1 year* (No. Participants)</b>                   | <b>Aflibercept (N = 95)</b>  | <b>Bevacizumab (N = 96)</b>  | <b>Ranibizumab (N = 97)</b>  |                |
| Any Cardiovascular Event,† excluding Hypertension                                          | 8 (8%)                       | 9 (9%)                       | 16 (16%)                     |                |
| Any Cardiovascular Event†                                                                  | 15 (16%)                     | 12 (13%)                     | 22 (23%)                     |                |
| Cardiac Events                                                                             | 5 (5%)                       | 5 (5%)                       | 9 (9%)                       |                |
| Cerebrovascular Events                                                                     | 0                            | 2 (2%)                       | 5 (5%)                       |                |
| Peripheral Vascular Disease Events                                                         | 1 (1%)                       | 0                            | 2 (2%)                       |                |
| Venous Disease Events                                                                      | 1 (1%)                       | 1 (1%)                       | 0                            |                |
| Hypertension Events                                                                        | 7 (7%)                       | 3 (3%)                       | 8 (8%)                       |                |
| Other Cardiovascular Events                                                                | 2 (2%)                       | 1 (1%)                       | 1 (1%)                       |                |
| <b>Participants with Bilateral Study Anti-VEGF Treatment prior to 1 year<sup>  </sup></b>  |                              |                              |                              |                |
| <b>Events occurring at least once through 1 year* (No. Participants)</b>                   | <b>Aflibercept (N = 129)</b> | <b>Bevacizumab (N = 122)</b> | <b>Ranibizumab (N = 121)</b> |                |
| Any Cardiovascular Event,† excluding Hypertension                                          | 12 (9%)                      | 10 (8%)                      | 21 (17%)                     |                |

|                                    |          |          |          |
|------------------------------------|----------|----------|----------|
| Any Cardiovascular Event †         | 27 (21%) | 23 (19%) | 34 (28%) |
| Cardiac Events                     | 9 (7%)   | 7 (6%)   | 14 (12%) |
| Cerebrovascular Events             | 0        | 2 (2%)   | 5 (4%)   |
| Peripheral Vascular Disease Events | 0        | 2 (2%)   | 0        |
| Venous Disease Events              | 0        | 1 (<1%)  | 2 (2%)   |
| Hypertension Events                | 19 (15%) | 13 (11%) | 18 (15%) |
| Other Cardiovascular Events        | 4 (3%)   | 1 (<1%)  | 3 (2%)   |

Anti-VEGF = anti vascular endothelial growth factor

\* One-year visit (If the 1 year visit was not completed or if it was completed prior to 365 days, then 365 days was used).

† Includes events with a Medical Dictionary for Regulatory Activities system organ class of cardiac disorder or vascular disorder as coded by the medical monitor. The following additional events not coded under these systems but related to a cardiac or vascular event or intervention are also included in the cardiovascular definition: cardiac murmur, cardiac pacemaker insertion/replacement, coronary arterial stent insertion, heart rate irregular, and stent placement. Participants with multiple events are only included once in the overall tabulation but could be included in more than one of the subcategories.

‡Global (overall 3 group comparison) P-value from Fisher's Exact Test. Pairwise comparisons from Fisher's Exact Test (adjusted for multiple comparisons by taking the maximum of the global and pairwise comparison P-values): aflibercept-bevacizumab: P=1.0, aflibercept-ranibizumab: P=0.015, bevacizumab-ranibizumab: P=0.014. Global P-value from Poisson model with robust variance estimation using the log link,<sup>4</sup> adjusting for gender, age at baseline, Hemoglobin A1c at baseline, diabetes type, diabetes duration at baseline, insulin use, prior coronary artery disease, prior myocardial infarction, prior stroke, prior transient ischemic attack, prior hypertension, smoking status: P=0.024. Pairwise comparisons from this model (adjusted for multiple comparisons by taking the maximum of the global and pairwise comparison P-values): bevacizumab-aflibercept: P=0.68, ranibizumab-aflibercept: P=0.040, ranibizumab-bevacizumab: P=0.024.

§Global (overall 3 group comparison) P-value from Fisher's Exact Test. Pairwise comparisons from Fisher's Exact Test (adjusted for multiple comparisons by taking the maximum of the global and pairwise comparison P-values): aflibercept-bevacizumab: P=0.53, aflibercept-ranibizumab: P=0.087, bevacizumab-ranibizumab: P=0.038. Global P-value from Poisson model with robust variance estimation using the log link,<sup>4</sup> adjusting for gender, age at baseline, Hemoglobin A1c at baseline, diabetes type, diabetes duration at baseline, insulin use, prior coronary artery disease, prior myocardial infarction, prior stroke, prior transient ischemic attack, prior hypertension, smoking status: P=0.081. Pairwise comparisons from this model (adjusted for multiple comparisons by taking the maximum of the global and pairwise comparison P-values): bevacizumab-aflibercept: P=0.37, ranibizumab-aflibercept: P=0.19, ranibizumab-bevacizumab: P=0.081.

||One-year visit (If the 1 year visit was not completed, then 365 days was used).

**Table S13. All Ocular Adverse Events Occurring in the Study Eye through 1 Year \*†**

| <b>No. Events (No. Participants)</b> | <b>Aflibercept<br/>(N = 224)</b> | <b>Bevacizumab<br/>(N = 218)</b> | <b>Ranibizumab<br/>(N = 218)</b> |
|--------------------------------------|----------------------------------|----------------------------------|----------------------------------|
| <b>Anterior chamber</b>              |                                  |                                  |                                  |
| Anterior chamber cell                | 0 (0)                            | 1 (1)                            | 2 (1)                            |
| Anterior chamber opacity             | 1 (1)                            | 0 (0)                            | 0 (0)                            |
| Foreign body in anterior chamber     | 0 (0)                            | 1 (1)                            | 0 (0)                            |
| Post procedural complication         | 0 (0)                            | 1 (1)                            | 0 (0)                            |
| <b>Conjunctiva</b>                   |                                  |                                  |                                  |
| Conjunctival haemorrhage             | 43 (25)                          | 56 (36)                          | 40 (23)                          |
| Conjunctival hyperaemia              | 0 (0)                            | 1 (1)                            | 2 (2)                            |
| Conjunctival oedema                  | 2 (2)                            | 0 (0)                            | 0 (0)                            |
| Conjunctivitis                       | 3 (3)                            | 0 (0)                            | 1 (1)                            |
| Conjunctivitis allergic              | 0 (0)                            | 2 (2)                            | 0 (0)                            |
| Conjunctivitis viral                 | 0 (0)                            | 0 (0)                            | 1 (1)                            |
| Eye discharge                        | 1 (1)                            | 2 (2)                            | 1 (1)                            |
| Ocular hyperaemia                    | 0 (0)                            | 7 (7)                            | 9 (9)                            |
| Pinguecula                           | 0 (0)                            | 0 (0)                            | 1 (1)                            |
| <b>Cornea</b>                        |                                  |                                  |                                  |
| Corneal abrasion                     | 4 (3)                            | 7 (7)                            | 5 (5)                            |
| Corneal disorder                     | 0 (0)                            | 0 (0)                            | 4 (3)                            |
| Corneal oedema                       | 1 (1)                            | 0 (0)                            | 0 (0)                            |
| Corneal opacity                      | 1 (1)                            | 0 (0)                            | 0 (0)                            |
| Corneal pigmentation                 | 2 (2)                            | 0 (0)                            | 0 (0)                            |
| Keratitis                            | 0 (0)                            | 1 (1)                            | 0 (0)                            |
| Keratitis sicca                      | 1 (1)                            | 0 (0)                            | 0 (0)                            |
| Keratopathy                          | 1 (1)                            | 0 (0)                            | 0 (0)                            |
| Punctate keratitis                   | 4 (3)                            | 2 (2)                            | 4 (4)                            |
| <b>External</b>                      |                                  |                                  |                                  |
| Arthropod bite                       | 0 (0)                            | 0 (0)                            | 1 (1)                            |
| Dry eye                              | 13 (13)                          | 8 (8)                            | 9 (9)                            |
| Dry eye syndrome                     | 1 (1)                            | 1 (1)                            | 2 (2)                            |
| Eye infection                        | 1 (1)                            | 0 (0)                            | 0 (0)                            |
| Eye irritation                       | 21 (12)                          | 19 (14)                          | 15 (12)                          |
| Eye swelling                         | 0 (0)                            | 2 (2)                            | 2 (2)                            |
| Hypersensitivity                     | 1 (1)                            | 0 (0)                            | 0 (0)                            |
| Lacrimation increased                | 11 (11)                          | 5 (5)                            | 8 (8)                            |
| Ocular discomfort                    | 5 (3)                            | 2 (2)                            | 5 (4)                            |
| Periorbital contusion                | 0 (0)                            | 1 (1)                            | 0 (0)                            |

|                                 |         |       |       |
|---------------------------------|---------|-------|-------|
| <b>Glaucoma-IOP</b>             |         |       |       |
| Glaucoma                        | 0 (0)   | 1 (1) | 2 (1) |
| Intraocular pressure increased  | 4 (4)   | 2 (2) | 7 (5) |
| Ocular hypertension             | 1 (1)   | 2 (2) | 1 (1) |
| <b>Inflammation</b>             |         |       |       |
| Choroiditis                     | 0 (0)   | 1 (1) | 0 (0) |
| Episcleritis                    | 0 (0)   | 0 (0) | 1 (1) |
| Iritis                          | 4 (2)   | 0 (0) | 1 (1) |
| <b>Lens</b>                     |         |       |       |
| Cataract                        | 10 (10) | 9 (9) | 8 (8) |
| Cataract cortical               | 0 (0)   | 2 (2) | 1 (1) |
| Cataract nuclear                | 1 (1)   | 1 (1) | 2 (2) |
| Cataract operation              | 1 (1)   | 0 (0) | 2 (2) |
| Cataract operation complication | 0 (0)   | 1 (1) | 0 (0) |
| Cataract subcapsular            | 4 (4)   | 4 (4) | 4 (4) |
| Posterior capsule opacification | 4 (4)   | 3 (3) | 4 (3) |
| <b>Lids</b>                     |         |       |       |
| Blepharal papilloma             | 1 (1)   | 0 (0) | 1 (1) |
| Blepharitis                     | 3 (2)   | 0 (0) | 4 (4) |
| Blepharospasm                   | 1 (1)   | 1 (1) | 2 (2) |
| Cutis laxa                      | 1 (1)   | 1 (1) | 0 (0) |
| Dermatitis contact              | 2 (1)   | 0 (0) | 0 (0) |
| Ecchymosis                      | 0 (0)   | 0 (0) | 1 (1) |
| Eyelid margin crusting          | 3 (3)   | 1 (1) | 0 (0) |
| Eyelid oedema                   | 1 (1)   | 0 (0) | 0 (0) |
| Eyelid ptosis                   | 1 (1)   | 0 (0) | 1 (1) |
| Hordeolum                       | 2 (2)   | 0 (0) | 2 (2) |
| Trichiasis                      | 0 (0)   | 1 (1) | 0 (0) |
| <b>Miscellaneous-eye</b>        |         |       |       |
| Asthenopia                      | 1 (1)   | 0 (0) | 1 (1) |
| <b>Optic nerve</b>              |         |       |       |
| Optic disc disorder             | 1 (1)   | 0 (0) | 1 (1) |
| Optic nerve cupping             | 1 (1)   | 0 (0) | 0 (0) |
| <b>Retina</b>                   |         |       |       |
| Cystoid macular oedema          | 0 (0)   | 1 (1) | 0 (0) |
| Diabetic retinal oedema         | 1 (1)   | 2 (2) | 1 (1) |
| Diabetic retinopathy            | 0 (0)   | 4 (3) | 0 (0) |
| Macular fibrosis                | 4 (4)   | 5 (5) | 0 (0) |
| Macular hole                    | 0 (0)   | 1 (1) | 0 (0) |

|                                    |         |         |         |
|------------------------------------|---------|---------|---------|
| Macular ischaemia                  | 2 (2)   | 1 (1)   | 1 (1)   |
| Retinal aneurysm                   | 0 (0)   | 0 (0)   | 1 (1)   |
| Retinal artery embolism            | 1 (1)   | 1 (1)   | 2 (2)   |
| Retinal degeneration               | 0 (0)   | 0 (0)   | 1 (1)   |
| Retinal disorder                   | 0 (0)   | 1 (1)   | 0 (0)   |
| Retinal exudates                   | 5 (5)   | 5 (5)   | 5 (4)   |
| Retinal haemorrhage                | 2 (2)   | 6 (5)   | 3 (3)   |
| Retinal ischaemia                  | 0 (0)   | 2 (2)   | 1 (1)   |
| Retinal neovascularisation         | 2 (2)   | 1 (1)   | 2 (1)   |
| Retinal tear                       | 0 (0)   | 1 (1)   | 1 (1)   |
| Retinal vascular disorder          | 0 (0)   | 0 (0)   | 1 (1)   |
| Retinal vein occlusion             | 0 (0)   | 1 (1)   | 0 (0)   |
| Retinopathy                        | 1 (1)   | 0 (0)   | 0 (0)   |
| Vitreous adhesions                 | 2 (2)   | 1 (1)   | 0 (0)   |
| <b>Sensation-pain</b>              |         |         |         |
| Abnormal sensation in eye          | 0 (0)   | 1 (1)   | 1 (1)   |
| Eye pain                           | 28 (21) | 30 (23) | 16 (16) |
| Eye pruritus                       | 8 (8)   | 9 (8)   | 9 (8)   |
| Eyelid pain                        | 1 (1)   | 3 (3)   | 0 (0)   |
| Facial pain                        | 1 (1)   | 0 (0)   | 0 (0)   |
| Foreign body sensation in eyes     | 3 (3)   | 6 (6)   | 6 (5)   |
| Headache                           | 0 (0)   | 1 (1)   | 1 (1)   |
| Pain                               | 0 (0)   | 1 (1)   | 0 (0)   |
| <b>Strabismus</b>                  |         |         |         |
| Strabismus                         | 0 (0)   | 1 (1)   | 0 (0)   |
| <b>Visual field</b>                |         |         |         |
| Scotoma                            | 0 (0)   | 2 (2)   | 0 (0)   |
| <b>Visual symptoms/abnormality</b> |         |         |         |
| Altered visual depth perception    | 0 (0)   | 1 (1)   | 0 (0)   |
| Diplopia                           | 5 (5)   | 1 (1)   | 7 (7)   |
| Glare                              | 0 (0)   | 1 (1)   | 2 (2)   |
| Metamorphopsia                     | 1 (1)   | 4 (4)   | 2 (2)   |
| Migraine with aura                 | 1 (1)   | 0 (0)   | 1 (1)   |
| Night blindness                    | 0 (0)   | 1 (1)   | 0 (0)   |
| Photophobia                        | 6 (6)   | 5 (5)   | 3 (3)   |
| Photopsia                          | 4 (4)   | 3 (3)   | 8 (6)   |
| Reading disorder                   | 0 (0)   | 1 (1)   | 0 (0)   |
| Vision blurred                     | 30 (27) | 35 (33) | 49 (39) |
| Visual acuity reduced              | 13 (12) | 16 (15) | 14 (12) |

|                       |         |         |         |
|-----------------------|---------|---------|---------|
| Visual impairment     | 10 (9)  | 6 (6)   | 8 (6)   |
| <b>Vitreous</b>       |         |         |         |
| Hyalosis asteroid     | 0 (0)   | 0 (0)   | 1 (1)   |
| Vitreous cells        | 1 (1)   | 0 (0)   | 1 (1)   |
| Vitreous degeneration | 0 (0)   | 3 (2)   | 1 (1)   |
| Vitreous detachment   | 7 (7)   | 8 (8)   | 4 (4)   |
| Vitreous disorder     | 0 (0)   | 0 (0)   | 1 (1)   |
| Vitreous floaters     | 34 (30) | 45 (41) | 41 (34) |
| Vitreous haemorrhage  | 6 (4)   | 13 (9)  | 7 (7)   |

\*One year visit (If the 1 year visit was not completed, then 365 days was used).

†Events based on medical monitor using Medical Dictionary for Regulatory Activities coding.

**Table S14. All Ocular Adverse Events Occurring in the Non-Study Eye from the First Non-Study Eye Injection through 1 Year \* †**

| <b>No. Events (No. Participants)</b> | <b>Aflibercept<br/>(N = 129)</b> | <b>Bevacizumab<br/>(N = 122)</b> | <b>Ranibizumab<br/>(N = 121)</b> |
|--------------------------------------|----------------------------------|----------------------------------|----------------------------------|
| <b>Anterior chamber</b>              |                                  |                                  |                                  |
| Anterior chamber cell                | 0 (0)                            | 1 (1)                            | 0 (0)                            |
| <b>Conjunctiva</b>                   |                                  |                                  |                                  |
| Conjunctival haemorrhage             | 24 (11)                          | 27 (13)                          | 14 (8)                           |
| Conjunctival hyperaemia              | 0 (0)                            | 1 (1)                            | 0 (0)                            |
| Conjunctivitis                       | 0 (0)                            | 1 (1)                            | 0 (0)                            |
| Conjunctivitis allergic              | 1 (1)                            | 0 (0)                            | 0 (0)                            |
| Eye discharge                        | 1 (1)                            | 1 (1)                            | 0 (0)                            |
| Ocular hyperaemia                    | 0 (0)                            | 1 (1)                            | 0 (0)                            |
| Pinguecula                           | 0 (0)                            | 0 (0)                            | 1 (1)                            |
| <b>Cornea</b>                        |                                  |                                  |                                  |
| Corneal abrasion                     | 2 (2)                            | 3 (2)                            | 0 (0)                            |
| Corneal defect                       | 0 (0)                            | 0 (0)                            | 1 (1)                            |
| Corneal disorder                     | 0 (0)                            | 0 (0)                            | 1 (1)                            |
| Corneal dystrophy                    | 1 (1)                            | 0 (0)                            | 0 (0)                            |
| Corneal irritation                   | 0 (0)                            | 2 (2)                            | 0 (0)                            |
| Corneal oedema                       | 0 (0)                            | 0 (0)                            | 2 (1)                            |
| Corneal scar                         | 1 (1)                            | 0 (0)                            | 0 (0)                            |
| Keratitis                            | 0 (0)                            | 1 (1)                            | 0 (0)                            |
| Punctate keratitis                   | 2 (2)                            | 1 (1)                            | 0 (0)                            |
| <b>External</b>                      |                                  |                                  |                                  |
| Arthropod sting                      | 1 (1)                            | 0 (0)                            | 0 (0)                            |
| Dry eye                              | 5 (5)                            | 6 (6)                            | 3 (3)                            |
| Eye infection                        | 1 (1)                            | 0 (0)                            | 0 (0)                            |
| Eye irritation                       | 7 (3)                            | 4 (4)                            | 9 (7)                            |
| Eye swelling                         | 0 (0)                            | 1 (1)                            | 0 (0)                            |
| Lacrimation increased                | 5 (5)                            | 1 (1)                            | 2 (2)                            |
| Ocular discomfort                    | 3 (1)                            | 1 (1)                            | 4 (4)                            |
| Ophthalmic herpes simplex            | 0 (0)                            | 2 (1)                            | 0 (0)                            |
| <b>Glaucoma-IOP</b>                  |                                  |                                  |                                  |
| Glaucoma                             | 0 (0)                            | 0 (0)                            | 1 (1)                            |
| Hypotony of eye                      | 1 (1)                            | 0 (0)                            | 0 (0)                            |
| Intraocular pressure increased       | 2 (2)                            | 4 (3)                            | 2 (2)                            |
| Ocular hypertension                  | 1 (1)                            | 0 (0)                            | 1 (1)                            |
| <b>Inflammation</b>                  |                                  |                                  |                                  |
| Anterior chamber flare               | 1 (1)                            | 1 (1)                            | 0 (0)                            |
| Iritis                               | 1 (1)                            | 1 (1)                            | 0 (0)                            |

|                                 |       |       |       |
|---------------------------------|-------|-------|-------|
| <b>Iris</b>                     |       |       |       |
| Iris adhesions                  | 1 (1) | 0 (0) | 0 (0) |
| <b>Lens</b>                     |       |       |       |
| Cataract                        | 4 (4) | 4 (4) | 3 (3) |
| Cataract cortical               | 0 (0) | 3 (3) | 1 (1) |
| Cataract nuclear                | 1 (1) | 0 (0) | 0 (0) |
| Cataract operation              | 1 (1) | 0 (0) | 0 (0) |
| Cataract operation complication | 0 (0) | 0 (0) | 1 (1) |
| Cataract subcapsular            | 2 (2) | 1 (1) | 2 (2) |
| Posterior capsule opacification | 2 (2) | 0 (0) | 3 (2) |
| <b>Lids</b>                     |       |       |       |
| Blepharitis                     | 0 (0) | 1 (1) | 3 (3) |
| Chalazion                       | 1 (1) | 0 (0) | 0 (0) |
| Cutis laxa                      | 0 (0) | 1 (1) | 0 (0) |
| Eyelid margin crusting          | 1 (1) | 1 (1) | 0 (0) |
| Eyelid oedema                   | 2 (2) | 0 (0) | 0 (0) |
| Hordeolum                       | 2 (1) | 0 (0) | 0 (0) |
| Skin lesion                     | 0 (0) | 0 (0) | 1 (1) |
| <b>Optic nerve</b>              |       |       |       |
| Optic atrophy                   | 0 (0) | 0 (0) | 1 (1) |
| Optic nerve cupping             | 1 (1) | 0 (0) | 0 (0) |
| Papilloedema                    | 1 (1) | 0 (0) | 0 (0) |
| <b>Retina</b>                   |       |       |       |
| Cystoid macular oedema          | 0 (0) | 0 (0) | 2 (2) |
| Diabetic retinal oedema         | 6 (6) | 6 (6) | 4 (4) |
| Diabetic retinopathy            | 1 (1) | 1 (1) | 4 (4) |
| Eye naevus                      | 0 (0) | 0 (0) | 1 (1) |
| Macular degeneration            | 0 (0) | 0 (0) | 1 (1) |
| Macular fibrosis                | 2 (2) | 6 (6) | 1 (1) |
| Macular hole                    | 0 (0) | 1 (1) | 0 (0) |
| Macular oedema                  | 1 (1) | 0 (0) | 2 (2) |
| Retinal aneurysm                | 0 (0) | 1 (1) | 0 (0) |
| Retinal exudates                | 1 (1) | 6 (6) | 2 (2) |
| Retinal haemorrhage             | 1 (1) | 1 (1) | 5 (5) |
| Retinal ischaemia               | 0 (0) | 1 (1) | 0 (0) |
| Retinal laser coagulation       | 1 (1) | 0 (0) | 1 (1) |
| Retinal neovascularisation      | 2 (2) | 0 (0) | 0 (0) |
| Retinal vein occlusion          | 0 (0) | 1 (1) | 0 (0) |
| Retinopathy                     | 1 (1) | 0 (0) | 0 (0) |
| Vitreous adhesions              | 1 (1) | 0 (0) | 0 (0) |
| <b>Sensation-pain</b>           |       |       |       |



|                                    |         |         |         |
|------------------------------------|---------|---------|---------|
| Eye pain                           | 13 (9)  | 14 (13) | 7 (5)   |
| Eye pruritus                       | 3 (3)   | 1 (1)   | 8 (8)   |
| Eyelid pain                        | 0 (0)   | 1 (1)   | 0 (0)   |
| Foreign body sensation in eyes     | 1 (1)   | 3 (3)   | 1 (1)   |
| Headache                           | 1 (1)   | 0 (0)   | 2 (2)   |
| Pain                               | 0 (0)   | 1 (1)   | 0 (0)   |
| <b>Visual symptoms/abnormality</b> |         |         |         |
| Altered visual depth perception    | 0 (0)   | 1 (1)   | 0 (0)   |
| Diplopia                           | 0 (0)   | 0 (0)   | 4 (4)   |
| Metamorphopsia                     | 0 (0)   | 2 (2)   | 2 (2)   |
| Migraine with aura                 | 1 (1)   | 0 (0)   | 0 (0)   |
| Photophobia                        | 5 (5)   | 1 (1)   | 1 (1)   |
| Photopsia                          | 3 (3)   | 3 (3)   | 5 (3)   |
| Reading disorder                   | 0 (0)   | 1 (1)   | 0 (0)   |
| Vision blurred                     | 16 (15) | 11 (11) | 22 (20) |
| Visual acuity reduced              | 7 (6)   | 6 (6)   | 7 (7)   |
| Visual impairment                  | 2 (2)   | 7 (5)   | 4 (3)   |
| <b>Vitreous</b>                    |         |         |         |
| Endophthalmitis                    | 2 (1)   | 0 (0)   | 1 (1)   |
| Vitreous cells                     | 1 (1)   | 1 (1)   | 0 (0)   |
| Vitreous degeneration              | 0 (0)   | 2 (1)   | 1 (1)   |
| Vitreous detachment                | 7 (7)   | 4 (4)   | 1 (1)   |
| Vitreous floaters                  | 14 (13) | 15 (14) | 20 (14) |
| Vitreous haemorrhage               | 5 (5)   | 10 (8)  | 3 (3)   |

\*One year visit (If the 1 year visit was not completed, then 365 days was used).

†Events based on medical monitor using Medical Dictionary for Regulatory Activities coding.

**Table S15. All Systemic Adverse Events Occurring Through 1 Year\*†**

| <b>No. Events (No. Participants)</b>        | <b>Aflibercept<br/>(N = 224)</b> | <b>Bevacizumab<br/>(N = 218)</b> | <b>Ranibizumab<br/>(N = 218)</b> |
|---------------------------------------------|----------------------------------|----------------------------------|----------------------------------|
| <b>Blood and lymphatic system disorders</b> |                                  |                                  |                                  |
| Anaemia                                     | 9 (9)                            | 2 (2)                            | 7 (7)                            |
| Anaemia of chronic disease                  | 2 (2)                            | 2 (2)                            | 1 (1)                            |
| Coagulopathy                                | 0 (0)                            | 1 (1)                            | 0 (0)                            |
| Leukocytosis                                | 1 (1)                            | 0 (0)                            | 0 (0)                            |
| Lymphadenopathy                             | 1 (1)                            | 0 (0)                            | 0 (0)                            |
| Lymphangitis                                | 1 (1)                            | 0 (0)                            | 0 (0)                            |
| Lymphoedema                                 | 1 (1)                            | 0 (0)                            | 0 (0)                            |
| <b>Cardiac disorders</b>                    |                                  |                                  |                                  |
| Acute coronary syndrome                     | 0 (0)                            | 0 (0)                            | 1 (1)                            |
| Angina pectoris                             | 0 (0)                            | 1 (1)                            | 0 (0)                            |
| Arrhythmia                                  | 1 (1)                            | 0 (0)                            | 0 (0)                            |
| Arteriosclerosis coronary artery            | 0 (0)                            | 0 (0)                            | 1 (1)                            |
| Atrial fibrillation                         | 2 (2)                            | 0 (0)                            | 2 (2)                            |
| Atrial flutter                              | 0 (0)                            | 0 (0)                            | 1 (1)                            |
| Atrioventricular block second degree        | 0 (0)                            | 0 (0)                            | 2 (2)                            |
| Bradycardia                                 | 0 (0)                            | 1 (1)                            | 0 (0)                            |
| Cardiac arrest                              | 1 (1)                            | 1 (1)                            | 0 (0)                            |
| Cardiac failure                             | 0 (0)                            | 1 (1)                            | 2 (2)                            |
| Cardiac failure congestive                  | 3 (3)                            | 6 (4)                            | 10 (7)                           |
| Cardiomegaly                                | 1 (1)                            | 1 (1)                            | 0 (0)                            |
| Coronary artery disease                     | 2 (2)                            | 3 (3)                            | 5 (5)                            |
| Diastolic dysfunction                       | 2 (1)                            | 1 (1)                            | 0 (0)                            |
| Hypertensive heart disease                  | 3 (2)                            | 2 (2)                            | 1 (1)                            |
| Myocardial infarction                       | 4 (4)                            | 1 (1)                            | 4 (4)                            |
| Palpitations                                | 0 (0)                            | 0 (0)                            | 2 (2)                            |
| Pericardial effusion                        | 0 (0)                            | 0 (0)                            | 1 (1)                            |
| Tachycardia                                 | 2 (1)                            | 1 (1)                            | 0 (0)                            |
| Tricuspid valve incompetence                | 0 (0)                            | 0 (0)                            | 1 (1)                            |
| Ventricular hypokinesia                     | 0 (0)                            | 0 (0)                            | 1 (1)                            |
| Ventricular tachycardia                     | 0 (0)                            | 0 (0)                            | 1 (1)                            |
| <b>Ear and labyrinth disorders</b>          |                                  |                                  |                                  |
| Deafness                                    | 0 (0)                            | 1 (1)                            | 0 (0)                            |
| Ear infection                               | 5 (5)                            | 2 (2)                            | 0 (0)                            |
| Ear pain                                    | 0 (0)                            | 1 (1)                            | 1 (1)                            |
| Tinnitus                                    | 1 (1)                            | 0 (0)                            | 0 (0)                            |
| <b>Endocrine disorders</b>                  |                                  |                                  |                                  |
| Adrenal mass                                | 0 (0)                            | 1 (1)                            | 0 (0)                            |
| Autoimmune thyroiditis                      | 1 (1)                            | 0 (0)                            | 0 (0)                            |

|                                      |         |        |         |
|--------------------------------------|---------|--------|---------|
| Diabetes mellitus                    | 5 (4)   | 3 (3)  | 6 (5)   |
| Diabetes mellitus inadequate control | 11 (10) | 7 (7)  | 11 (11) |
| Diabetic ketoacidosis                | 2 (2)   | 1 (1)  | 1 (1)   |
| Glucocorticoid deficiency            | 1 (1)   | 0 (0)  | 0 (0)   |
| Hyperglycaemia                       | 3 (3)   | 2 (2)  | 0 (0)   |
| Hyperthyroidism                      | 0 (0)   | 0 (0)  | 1 (1)   |
| Hypoglycaemia                        | 9 (8)   | 8 (7)  | 6 (6)   |
| Hypothyroidism                       | 5 (5)   | 1 (1)  | 2 (2)   |
| <b>Gastrointestinal disorders</b>    |         |        |         |
| Abdominal discomfort                 | 4 (4)   | 6 (6)  | 0 (0)   |
| Abdominal distension                 | 0 (0)   | 0 (0)  | 1 (1)   |
| Abdominal pain                       | 3 (2)   | 6 (4)  | 3 (2)   |
| Abdominal pain upper                 | 1 (1)   | 2 (2)  | 2 (2)   |
| Barrett's oesophagus                 | 1 (1)   | 0 (0)  | 0 (0)   |
| Clostridium difficile colitis        | 2 (2)   | 1 (1)  | 1 (1)   |
| Colitis ulcerative                   | 0 (0)   | 1 (1)  | 0 (0)   |
| Colon cancer                         | 0 (0)   | 1 (1)  | 1 (1)   |
| Colorectal cancer                    | 0 (0)   | 0 (0)  | 1 (1)   |
| Constipation                         | 5 (5)   | 5 (4)  | 7 (7)   |
| Dental caries                        | 1 (1)   | 0 (0)  | 0 (0)   |
| Diabetic gastroparesis               | 2 (2)   | 0 (0)  | 1 (1)   |
| Diarrhoea                            | 6 (5)   | 12 (9) | 9 (8)   |
| Diverticulum                         | 0 (0)   | 0 (0)  | 1 (1)   |
| Dyspepsia                            | 2 (2)   | 3 (3)  | 2 (2)   |
| Gastric cancer stage I               | 0 (0)   | 0 (0)  | 1 (1)   |
| Gastric ulcer                        | 0 (0)   | 0 (0)  | 1 (1)   |
| Gastritis                            | 0 (0)   | 2 (2)  | 1 (1)   |
| Gastroenteritis                      | 0 (0)   | 2 (2)  | 1 (1)   |
| Gastroenteritis viral                | 6 (6)   | 4 (4)  | 6 (5)   |
| Gastrointestinal haemorrhage         | 0 (0)   | 0 (0)  | 1 (1)   |
| Gastrointestinal stoma complication  | 0 (0)   | 0 (0)  | 1 (1)   |
| Gastrooesophageal reflux disease     | 5 (5)   | 4 (4)  | 2 (2)   |
| Haematochezia                        | 1 (1)   | 0 (0)  | 0 (0)   |
| Haemorrhoids                         | 2 (2)   | 1 (1)  | 0 (0)   |
| Hiatus hernia                        | 0 (0)   | 0 (0)  | 1 (1)   |
| Impaired gastric emptying            | 0 (0)   | 0 (0)  | 3 (1)   |
| Intestinal perforation               | 0 (0)   | 1 (1)  | 0 (0)   |
| Nausea                               | 7 (7)   | 10 (7) | 8 (7)   |
| Oesophagitis                         | 1 (1)   | 0 (0)  | 1 (1)   |
| Pancreatitis                         | 1 (1)   | 1 (1)  | 0 (0)   |
| Peptic ulcer                         | 0 (0)   | 1 (1)  | 1 (1)   |
| Rectal haemorrhage                   | 1 (1)   | 0 (0)  | 0 (0)   |
| Rectal ulcer                         | 0 (0)   | 0 (0)  | 1 (1)   |

|                                                             |         |        |         |
|-------------------------------------------------------------|---------|--------|---------|
| Tooth abscess                                               | 3 (3)   | 1 (1)  | 4 (4)   |
| Tooth fracture                                              | 2 (2)   | 1 (1)  | 0 (0)   |
| Tooth impacted                                              | 0 (0)   | 1 (1)  | 0 (0)   |
| Tooth infection                                             | 1 (1)   | 0 (0)  | 2 (2)   |
| Toothache                                                   | 1 (1)   | 1 (1)  | 0 (0)   |
| Vomiting                                                    | 14 (11) | 10 (7) | 4 (4)   |
| <b>General disorders and administration site conditions</b> |         |        |         |
| Chest discomfort                                            | 0 (0)   | 0 (0)  | 2 (2)   |
| Chest pain                                                  | 4 (4)   | 4 (3)  | 4 (4)   |
| Chills                                                      | 1 (1)   | 0 (0)  | 2 (2)   |
| Cyst                                                        | 2 (2)   | 2 (2)  | 2 (2)   |
| Death                                                       | 1 (1)   | 1 (1)  | 0 (0)   |
| Device related infection                                    | 0 (0)   | 1 (1)  | 0 (0)   |
| Facial pain                                                 | 0 (0)   | 2 (2)  | 0 (0)   |
| Fatigue                                                     | 7 (7)   | 7 (7)  | 1 (1)   |
| Generalised oedema                                          | 0 (0)   | 0 (0)  | 1 (1)   |
| Lethargy                                                    | 0 (0)   | 2 (2)  | 0 (0)   |
| Local swelling                                              | 1 (1)   | 0 (0)  | 1 (1)   |
| Necrosis                                                    | 0 (0)   | 0 (0)  | 1 (1)   |
| Oedema peripheral                                           | 5 (5)   | 5 (5)  | 8 (7)   |
| Pain                                                        | 5 (4)   | 1 (1)  | 4 (4)   |
| Pyrexia                                                     | 1 (1)   | 5 (5)  | 3 (2)   |
| Swelling                                                    | 4 (4)   | 2 (2)  | 2 (2)   |
| <b>Hepatobiliary disorders</b>                              |         |        |         |
| Cholecystitis acute                                         | 0 (0)   | 1 (1)  | 3 (3)   |
| Cholecystitis chronic                                       | 0 (0)   | 1 (1)  | 0 (0)   |
| Cholelithiasis                                              | 1 (1)   | 1 (1)  | 0 (0)   |
| <b>Immune system disorders</b>                              |         |        |         |
| Drug hypersensitivity                                       | 1 (1)   | 0 (0)  | 1 (1)   |
| Hypersensitivity                                            | 2 (2)   | 2 (2)  | 1 (1)   |
| Seasonal allergy                                            | 8 (8)   | 8 (8)  | 7 (7)   |
| Urticaria                                                   | 0 (0)   | 1 (1)  | 1 (1)   |
| <b>Infections and infestations</b>                          |         |        |         |
| Abscess                                                     | 4 (4)   | 1 (1)  | 0 (0)   |
| Bacteraemia                                                 | 0 (0)   | 0 (0)  | 1 (1)   |
| Diverticulitis                                              | 1 (1)   | 0 (0)  | 0 (0)   |
| Escherichia infection                                       | 0 (0)   | 0 (0)  | 1 (1)   |
| Fungal infection                                            | 1 (1)   | 0 (0)  | 0 (0)   |
| Helicobacter infection                                      | 0 (0)   | 1 (1)  | 0 (0)   |
| Infection                                                   | 3 (3)   | 6 (6)  | 7 (7)   |
| Influenza                                                   | 11 (11) | 8 (8)  | 13 (12) |
| Localized infection                                         | 5 (4)   | 9 (9)  | 7 (7)   |

|                                                       |        |         |        |
|-------------------------------------------------------|--------|---------|--------|
| Oral herpes                                           | 1 (1)  | 0 (0)   | 0 (0)  |
| Postoperative wound infection                         | 1 (1)  | 0 (0)   | 0 (0)  |
| Sepsis                                                | 3 (3)  | 1 (1)   | 1 (1)  |
| Septic shock                                          | 0 (0)  | 1 (1)   | 0 (0)  |
| Staphylococcal infection                              | 0 (0)  | 0 (0)   | 1 (1)  |
| <b>Injury, poisoning and procedural complications</b> |        |         |        |
| Animal bite                                           | 0 (0)  | 0 (0)   | 1 (1)  |
| Arthropod bite                                        | 0 (0)  | 0 (0)   | 1 (1)  |
| Arthropod sting                                       | 2 (2)  | 0 (0)   | 0 (0)  |
| Asbestosis                                            | 1 (1)  | 0 (0)   | 0 (0)  |
| Burns second degree                                   | 0 (0)  | 1 (1)   | 0 (0)  |
| Chemical injury                                       | 0 (0)  | 0 (0)   | 1 (1)  |
| Fall                                                  | 10 (8) | 17 (11) | 12 (9) |
| Fibula fracture                                       | 1 (1)  | 0 (0)   | 0 (0)  |
| Head injury                                           | 0 (0)  | 1 (1)   | 1 (1)  |
| Heat exhaustion                                       | 0 (0)  | 0 (0)   | 1 (1)  |
| Hypothermia                                           | 1 (1)  | 0 (0)   | 0 (0)  |
| Injury                                                | 1 (1)  | 0 (0)   | 0 (0)  |
| Joint injury                                          | 3 (3)  | 0 (0)   | 0 (0)  |
| Laceration                                            | 1 (1)  | 1 (1)   | 4 (4)  |
| Limb injury                                           | 1 (1)  | 1 (1)   | 2 (2)  |
| Skin injury                                           | 0 (0)  | 1 (1)   | 0 (0)  |
| Spinal fracture                                       | 0 (0)  | 1 (1)   | 0 (0)  |
| Subgaleal haematoma                                   | 1 (1)  | 0 (0)   | 0 (0)  |
| Thermal burn                                          | 0 (0)  | 1 (1)   | 2 (2)  |
| <b>Investigations</b>                                 |        |         |        |
| Biopsy skin                                           | 0 (0)  | 0 (0)   | 1 (1)  |
| Blood creatine increased                              | 0 (0)  | 0 (0)   | 1 (1)  |
| Blood creatinine abnormal                             | 2 (2)  | 2 (2)   | 2 (2)  |
| Blood glucose decreased                               | 2 (2)  | 2 (2)   | 2 (2)  |
| Blood glucose increased                               | 2 (2)  | 1 (1)   | 0 (0)  |
| Blood potassium decreased                             | 1 (1)  | 1 (1)   | 0 (0)  |
| Blood potassium increased                             | 2 (2)  | 1 (1)   | 2 (2)  |
| Blood testosterone decreased                          | 1 (1)  | 0 (0)   | 0 (0)  |
| Colonoscopy                                           | 1 (1)  | 0 (0)   | 0 (0)  |
| Glycosylated haemoglobin increased                    | 0 (0)  | 0 (0)   | 1 (1)  |
| Haematocrit abnormal                                  | 0 (0)  | 0 (0)   | 1 (1)  |
| Hepatic enzyme increased                              | 0 (0)  | 0 (0)   | 1 (1)  |
| International normalised ratio increased              | 3 (2)  | 0 (0)   | 1 (1)  |
| Laboratory test abnormal                              | 1 (1)  | 2 (2)   | 2 (1)  |
| Low density lipoprotein increased                     | 1 (1)  | 0 (0)   | 0 (0)  |
| Mammogram abnormal                                    | 1 (1)  | 0 (0)   | 0 (0)  |

|                                                        |       |         |         |
|--------------------------------------------------------|-------|---------|---------|
| Mean cell haemoglobin increased                        | 0 (0) | 1 (1)   | 0 (0)   |
| Monocyte count increased                               | 0 (0) | 1 (1)   | 0 (0)   |
| Protein urine present                                  | 2 (2) | 1 (1)   | 1 (1)   |
| Red blood cell count decreased                         | 1 (1) | 1 (1)   | 0 (0)   |
| Weight decreased                                       | 1 (1) | 0 (0)   | 1 (1)   |
| <b>Metabolism and nutrition disorders</b>              |       |         |         |
| Abnormal weight gain                                   | 1 (1) | 0 (0)   | 1 (1)   |
| Acidosis                                               | 0 (0) | 0 (0)   | 1 (1)   |
| Decreased appetite                                     | 1 (1) | 3 (3)   | 0 (0)   |
| Dehydration                                            | 5 (4) | 1 (1)   | 5 (5)   |
| Fluid overload                                         | 0 (0) | 0 (0)   | 1 (1)   |
| Fluid retention                                        | 2 (2) | 2 (2)   | 0 (0)   |
| Haemochromatosis                                       | 0 (0) | 0 (0)   | 1 (1)   |
| Hypercholesterolaemia                                  | 9 (9) | 5 (5)   | 6 (6)   |
| Hyperkalaemia                                          | 2 (2) | 2 (2)   | 2 (2)   |
| Hyperlipidaemia                                        | 3 (3) | 1 (1)   | 3 (2)   |
| Hyperphosphataemia                                     | 1 (1) | 1 (1)   | 0 (0)   |
| Hypertriglyceridaemia                                  | 1 (1) | 1 (1)   | 0 (0)   |
| Hypocalcaemia                                          | 0 (0) | 0 (0)   | 1 (1)   |
| Hypokalaemia                                           | 3 (3) | 1 (1)   | 0 (0)   |
| Hypomagnesaemia                                        | 0 (0) | 0 (0)   | 1 (1)   |
| Hyponatraemia                                          | 1 (1) | 0 (0)   | 0 (0)   |
| Iron deficiency                                        | 1 (1) | 1 (1)   | 2 (2)   |
| Metabolic disorder                                     | 1 (1) | 0 (0)   | 0 (0)   |
| Obesity                                                | 1 (1) | 0 (0)   | 1 (1)   |
| Vitamin B12 deficiency                                 | 0 (0) | 0 (0)   | 1 (1)   |
| Vitamin D deficiency                                   | 2 (2) | 0 (0)   | 6 (6)   |
| <b>Musculoskeletal and connective tissue disorders</b> |       |         |         |
| Ankle fracture                                         | 2 (2) | 0 (0)   | 1 (1)   |
| Arthralgia                                             | 7 (7) | 6 (6)   | 8 (8)   |
| Arthritis                                              | 0 (0) | 1 (1)   | 2 (2)   |
| Back pain                                              | 7 (7) | 12 (11) | 13 (11) |
| Bone pain                                              | 0 (0) | 1 (1)   | 0 (0)   |
| Bursitis                                               | 0 (0) | 0 (0)   | 1 (1)   |
| Coccydynia                                             | 0 (0) | 1 (1)   | 0 (0)   |
| Dupuytren's contracture                                | 0 (0) | 2 (1)   | 0 (0)   |
| Exostosis                                              | 1 (1) | 0 (0)   | 0 (0)   |
| Facial bones fracture                                  | 0 (0) | 0 (0)   | 1 (1)   |
| Femur fracture                                         | 0 (0) | 1 (1)   | 0 (0)   |
| Fibromyalgia                                           | 0 (0) | 0 (0)   | 2 (2)   |
| Foot deformity                                         | 0 (0) | 1 (1)   | 1 (1)   |
| Foot fracture                                          | 4 (4) | 4 (4)   | 0 (0)   |

|                                                                                 |       |        |       |
|---------------------------------------------------------------------------------|-------|--------|-------|
| Gout                                                                            | 1 (1) | 1 (1)  | 1 (1) |
| Hand fracture                                                                   | 2 (2) | 0 (0)  | 2 (1) |
| Hip fracture                                                                    | 0 (0) | 0 (0)  | 1 (1) |
| Inclusion body myositis                                                         | 1 (1) | 0 (0)  | 0 (0) |
| Intervertebral disc protrusion                                                  | 0 (0) | 3 (2)  | 1 (1) |
| Ligament sprain                                                                 | 5 (4) | 3 (2)  | 7 (6) |
| Lower limb fracture                                                             | 0 (0) | 1 (1)  | 0 (0) |
| Meniscus injury                                                                 | 0 (0) | 1 (1)  | 1 (1) |
| Multiple fractures                                                              | 3 (3) | 1 (1)  | 3 (3) |
| Muscle spasms                                                                   | 2 (2) | 4 (4)  | 0 (0) |
| Muscle strain                                                                   | 1 (1) | 2 (2)  | 2 (2) |
| Muscular weakness                                                               | 4 (4) | 1 (1)  | 3 (3) |
| Musculoskeletal discomfort                                                      | 1 (1) | 2 (2)  | 0 (0) |
| Musculoskeletal pain                                                            | 2 (2) | 6 (6)  | 3 (3) |
| Myalgia                                                                         | 1 (1) | 4 (3)  | 0 (0) |
| Neck pain                                                                       | 0 (0) | 0 (0)  | 2 (2) |
| Neuropathic arthropathy                                                         | 2 (1) | 1 (1)  | 0 (0) |
| Osteoarthritis                                                                  | 2 (2) | 3 (3)  | 5 (5) |
| Osteomyelitis                                                                   | 2 (2) | 3 (3)  | 2 (2) |
| Pain in extremity                                                               | 4 (4) | 10 (8) | 5 (5) |
| Pelvic fracture                                                                 | 1 (1) | 0 (0)  | 0 (0) |
| Plantar fasciitis                                                               | 2 (2) | 0 (0)  | 0 (0) |
| Psoriatic arthropathy                                                           | 0 (0) | 0 (0)  | 1 (1) |
| Rheumatoid arthritis                                                            | 1 (1) | 3 (2)  | 0 (0) |
| Rib fracture                                                                    | 2 (2) | 1 (1)  | 2 (2) |
| Rotator cuff syndrome                                                           | 2 (2) | 0 (0)  | 2 (2) |
| Tendon disorder                                                                 | 0 (0) | 1 (1)  | 0 (0) |
| Tendonitis                                                                      | 2 (2) | 0 (0)  | 1 (1) |
| Trigger finger                                                                  | 3 (3) | 1 (1)  | 3 (3) |
| Upper limb fracture                                                             | 2 (2) | 1 (1)  | 1 (1) |
| Wrist fracture                                                                  | 2 (2) | 2 (2)  | 0 (0) |
| <b>Neoplasms benign, malignant and unspecified (including cysts and polyps)</b> |       |        |       |
| Neoplasm malignant                                                              | 0 (0) | 1 (1)  | 0 (0) |
| Polyp                                                                           | 0 (0) | 2 (2)  | 2 (2) |
| Squamous cell carcinoma                                                         | 2 (1) | 1 (1)  | 0 (0) |
| <b>Nervous system disorders</b>                                                 |       |        |       |
| Amnesia                                                                         | 0 (0) | 2 (2)  | 0 (0) |
| Balance disorder                                                                | 3 (2) | 0 (0)  | 0 (0) |
| Brain neoplasm                                                                  | 0 (0) | 0 (0)  | 2 (2) |
| Carpal tunnel syndrome                                                          | 5 (2) | 1 (1)  | 1 (1) |
| Cerebral atrophy                                                                | 1 (1) | 0 (0)  | 0 (0) |
| Concussion                                                                      | 0 (0) | 0 (0)  | 1 (1) |

|                                    |         |         |         |
|------------------------------------|---------|---------|---------|
| Convulsion                         | 0 (0)   | 0 (0)   | 7 (3)   |
| Dementia Alzheimer's type          | 0 (0)   | 1 (1)   | 0 (0)   |
| Diabetic neuropathy                | 2 (2)   | 8 (8)   | 5 (5)   |
| Dizziness                          | 9 (8)   | 7 (7)   | 9 (8)   |
| Dysarthria                         | 1 (1)   | 0 (0)   | 0 (0)   |
| Encephalopathy                     | 2 (2)   | 0 (0)   | 1 (1)   |
| Epilepsy                           | 0 (0)   | 0 (0)   | 1 (1)   |
| Headache                           | 18 (14) | 18 (14) | 13 (13) |
| Hemiparesis                        | 1 (1)   | 0 (0)   | 0 (0)   |
| Hypoaesthesia                      | 1 (1)   | 1 (1)   | 1 (1)   |
| Hypogeusia                         | 0 (0)   | 1 (1)   | 0 (0)   |
| Meningioma                         | 0 (0)   | 0 (0)   | 1 (1)   |
| Migraine                           | 8 (7)   | 2 (2)   | 2 (2)   |
| Multiple sclerosis                 | 0 (0)   | 0 (0)   | 1 (1)   |
| Nerve injury                       | 0 (0)   | 1 (1)   | 0 (0)   |
| Neuropathy peripheral              | 2 (2)   | 3 (3)   | 6 (6)   |
| Paraesthesia                       | 0 (0)   | 1 (1)   | 0 (0)   |
| Presyncope                         | 1 (1)   | 4 (3)   | 1 (1)   |
| Radiculitis brachial               | 0 (0)   | 0 (0)   | 1 (1)   |
| Restless legs syndrome             | 1 (1)   | 0 (0)   | 1 (1)   |
| Sciatica                           | 1 (1)   | 1 (1)   | 1 (1)   |
| Somnolence                         | 1 (1)   | 0 (0)   | 0 (0)   |
| Spinal column stenosis             | 1 (1)   | 0 (0)   | 1 (1)   |
| Syncope                            | 0 (0)   | 1 (1)   | 4 (4)   |
| Tremor                             | 0 (0)   | 0 (0)   | 1 (1)   |
| VIIIth nerve paralysis             | 4 (4)   | 0 (0)   | 1 (1)   |
| Vertigo                            | 5 (5)   | 4 (4)   | 1 (1)   |
| Vestibular neuronitis              | 1 (1)   | 0 (0)   | 0 (0)   |
| <b>Psychiatric disorders</b>       |         |         |         |
| Anxiety                            | 5 (5)   | 6 (6)   | 4 (4)   |
| Bipolar disorder                   | 1 (1)   | 0 (0)   | 2 (2)   |
| Dementia                           | 0 (0)   | 0 (0)   | 2 (2)   |
| Depression                         | 5 (5)   | 4 (4)   | 4 (4)   |
| Drug abuse                         | 0 (0)   | 0 (0)   | 1 (1)   |
| Insomnia                           | 1 (1)   | 2 (2)   | 2 (2)   |
| Mental disorder                    | 1 (1)   | 1 (1)   | 0 (0)   |
| Psychotic disorder                 | 0 (0)   | 0 (0)   | 1 (1)   |
| Schizoaffective disorder           | 0 (0)   | 0 (0)   | 1 (1)   |
| Stress                             | 0 (0)   | 1 (1)   | 0 (0)   |
| <b>Renal and urinary disorders</b> |         |         |         |
| Bladder cancer                     | 0 (0)   | 1 (1)   | 0 (0)   |
| Bladder prolapse                   | 0 (0)   | 0 (0)   | 1 (1)   |
| Bladder spasm                      | 0 (0)   | 0 (0)   | 1 (1)   |



|                                                        |         |         |        |
|--------------------------------------------------------|---------|---------|--------|
| Cystitis                                               | 5 (4)   | 2 (2)   | 1 (1)  |
| Diabetic nephropathy                                   | 0 (0)   | 1 (1)   | 0 (0)  |
| Dysuria                                                | 1 (1)   | 0 (0)   | 0 (0)  |
| Glomerulonephritis membranous                          | 0 (0)   | 1 (1)   | 0 (0)  |
| Haematuria                                             | 1 (1)   | 3 (3)   | 0 (0)  |
| Hydronephrosis                                         | 0 (0)   | 0 (0)   | 1 (1)  |
| Hypertonic bladder                                     | 0 (0)   | 1 (1)   | 0 (0)  |
| Kidney infection                                       | 1 (1)   | 1 (1)   | 2 (2)  |
| Microalbuminuria                                       | 1 (1)   | 0 (0)   | 0 (0)  |
| Micturition urgency                                    | 0 (0)   | 0 (0)   | 2 (2)  |
| Nephrolithiasis                                        | 3 (3)   | 1 (1)   | 0 (0)  |
| Nephropathy                                            | 1 (1)   | 3 (3)   | 2 (2)  |
| Proteinuria                                            | 2 (2)   | 2 (2)   | 1 (1)  |
| Renal failure                                          | 7 (7)   | 7 (6)   | 9 (8)  |
| Renal failure acute                                    | 3 (3)   | 2 (2)   | 2 (2)  |
| Renal failure chronic                                  | 7 (6)   | 2 (2)   | 9 (8)  |
| Renal impairment                                       | 5 (5)   | 3 (3)   | 2 (2)  |
| Urinary hesitation                                     | 0 (0)   | 1 (1)   | 0 (0)  |
| Urinary incontinence                                   | 0 (0)   | 1 (1)   | 2 (2)  |
| Urinary retention                                      | 0 (0)   | 0 (0)   | 1 (1)  |
| Urinary tract infection                                | 14 (13) | 16 (13) | 8 (7)  |
| <b>Reproductive system and breast disorders</b>        |         |         |        |
| Benign prostatic hyperplasia                           | 1 (1)   | 0 (0)   | 0 (0)  |
| Breast cancer                                          | 0 (0)   | 1 (1)   | 0 (0)  |
| Endometrial hyperplasia                                | 0 (0)   | 1 (1)   | 0 (0)  |
| Erectile dysfunction                                   | 0 (0)   | 0 (0)   | 2 (2)  |
| Fibrocystic breast disease                             | 0 (0)   | 0 (0)   | 1 (1)  |
| Ovarian neoplasm                                       | 1 (1)   | 0 (0)   | 0 (0)  |
| Prostatitis                                            | 0 (0)   | 0 (0)   | 1 (1)  |
| Prostatomegaly                                         | 1 (1)   | 0 (0)   | 1 (1)  |
| Uterine prolapse                                       | 0 (0)   | 1 (1)   | 0 (0)  |
| <b>Respiratory, thoracic and mediastinal disorders</b> |         |         |        |
| Acute respiratory failure                              | 3 (3)   | 1 (1)   | 3 (3)  |
| Asthma                                                 | 4 (4)   | 1 (1)   | 1 (1)  |
| Bronchitis                                             | 9 (8)   | 14 (9)  | 8 (7)  |
| Cardio-respiratory arrest                              | 0 (0)   | 1 (1)   | 0 (0)  |
| Chronic obstructive pulmonary disease                  | 1 (1)   | 2 (2)   | 1 (1)  |
| Chronic sinusitis                                      | 1 (1)   | 1 (1)   | 1 (1)  |
| Cough                                                  | 13 (13) | 9 (7)   | 12 (9) |
| Dyspnoea                                               | 7 (7)   | 7 (5)   | 6 (4)  |
| Epistaxis                                              | 4 (1)   | 1 (1)   | 1 (1)  |

|                                               |         |         |         |
|-----------------------------------------------|---------|---------|---------|
| Hypoxia                                       | 0 (0)   | 2 (2)   | 0 (0)   |
| Nasal congestion                              | 3 (3)   | 4 (4)   | 2 (2)   |
| Nasal dryness                                 | 1 (1)   | 0 (0)   | 0 (0)   |
| Nasopharyngitis                               | 31 (27) | 22 (20) | 17 (16) |
| Oropharyngeal pain                            | 1 (1)   | 5 (5)   | 2 (2)   |
| Pharyngitis streptococcal                     | 0 (0)   | 1 (1)   | 0 (0)   |
| Pneumonia                                     | 7 (5)   | 6 (6)   | 10 (9)  |
| Pulmonary embolism                            | 0 (0)   | 0 (0)   | 1 (1)   |
| Pulmonary fibrosis                            | 1 (1)   | 0 (0)   | 0 (0)   |
| Pulmonary hypertension                        | 0 (0)   | 0 (0)   | 1 (1)   |
| Pulmonary oedema                              | 0 (0)   | 0 (0)   | 1 (1)   |
| Respiratory distress                          | 0 (0)   | 0 (0)   | 1 (1)   |
| Respiratory tract congestion                  | 0 (0)   | 1 (1)   | 1 (1)   |
| Respiratory tract infection                   | 3 (3)   | 2 (2)   | 2 (2)   |
| Respiratory tract oedema                      | 0 (0)   | 1 (1)   | 0 (0)   |
| Rhinitis allergic                             | 0 (0)   | 3 (3)   | 2 (2)   |
| Sinusitis                                     | 13 (12) | 8 (8)   | 20 (13) |
| Sleep apnoea syndrome                         | 0 (0)   | 2 (2)   | 1 (1)   |
| Sneezing                                      | 1 (1)   | 0 (0)   | 0 (0)   |
| Upper respiratory tract infection             | 11 (10) | 3 (3)   | 10 (10) |
| Wheezing                                      | 1 (1)   | 0 (0)   | 1 (1)   |
| <b>Skin and subcutaneous tissue disorders</b> |         |         |         |
| Actinic keratosis                             | 0 (0)   | 0 (0)   | 2 (1)   |
| Alopecia                                      | 1 (1)   | 1 (1)   | 2 (2)   |
| Angioedema                                    | 0 (0)   | 0 (0)   | 1 (1)   |
| Basal cell carcinoma                          | 4 (4)   | 0 (0)   | 1 (1)   |
| Blister                                       | 0 (0)   | 1 (1)   | 0 (0)   |
| Cellulitis                                    | 9 (9)   | 11 (9)  | 4 (4)   |
| Cellulitis gangrenous                         | 0 (0)   | 1 (1)   | 0 (0)   |
| Contusion                                     | 0 (0)   | 3 (3)   | 1 (1)   |
| Dermal cyst                                   | 1 (1)   | 0 (0)   | 0 (0)   |
| Dermatitis allergic                           | 2 (2)   | 1 (1)   | 1 (1)   |
| Dermatitis contact                            | 1 (1)   | 1 (1)   | 0 (0)   |
| Diabetic foot                                 | 1 (1)   | 4 (4)   | 7 (5)   |
| Diabetic ulcer                                | 0 (0)   | 0 (0)   | 1 (1)   |
| Ecchymosis                                    | 1 (1)   | 0 (0)   | 0 (0)   |
| Eczema                                        | 0 (0)   | 0 (0)   | 1 (1)   |
| Excoriation                                   | 2 (2)   | 2 (2)   | 1 (1)   |
| Furuncle                                      | 3 (2)   | 0 (0)   | 2 (2)   |
| Herpes zoster                                 | 1 (1)   | 1 (1)   | 3 (3)   |
| Hyperkeratosis                                | 1 (1)   | 0 (0)   | 0 (0)   |
| In-growing nail                               | 0 (0)   | 1 (1)   | 0 (0)   |
| Melanocytic naevus                            | 0 (0)   | 0 (0)   | 1 (1)   |

|                                        |         |         |         |
|----------------------------------------|---------|---------|---------|
| Nail avulsion                          | 0 (0)   | 0 (0)   | 1 (1)   |
| Pruritus                               | 2 (2)   | 2 (2)   | 0 (0)   |
| Psoriasis                              | 0 (0)   | 1 (1)   | 0 (0)   |
| Rash                                   | 4 (4)   | 3 (3)   | 1 (1)   |
| Skin bacterial infection               | 1 (1)   | 2 (2)   | 1 (1)   |
| Skin cancer                            | 0 (0)   | 2 (2)   | 2 (2)   |
| Skin disorder                          | 0 (0)   | 0 (0)   | 1 (1)   |
| Skin infection                         | 5 (5)   | 0 (0)   | 1 (1)   |
| Skin lesion                            | 1 (1)   | 0 (0)   | 3 (2)   |
| Skin papilloma                         | 1 (1)   | 0 (0)   | 2 (1)   |
| Skin ulcer                             | 4 (4)   | 2 (2)   | 0 (0)   |
| <b>Social circumstances</b>            |         |         |         |
| Menopause                              | 0 (0)   | 1 (1)   | 0 (0)   |
| <b>Surgical and medical procedures</b> |         |         |         |
| Cardiac pacemaker insertion            | 0 (0)   | 1 (1)   | 0 (0)   |
| Cardiac pacemaker replacement          | 1 (1)   | 0 (0)   | 0 (0)   |
| Foot amputation                        | 0 (0)   | 1 (1)   | 0 (0)   |
| Gastric bypass                         | 1 (1)   | 0 (0)   | 0 (0)   |
| Hip arthroplasty                       | 0 (0)   | 0 (0)   | 1 (1)   |
| Hyperbaric oxygen therapy              | 0 (0)   | 1 (1)   | 0 (0)   |
| Inguinal hernia repair                 | 1 (1)   | 0 (0)   | 0 (0)   |
| Knee operation                         | 0 (0)   | 0 (0)   | 1 (1)   |
| Sinus operation                        | 0 (0)   | 1 (1)   | 0 (0)   |
| Skin lesion excision                   | 1 (1)   | 0 (0)   | 0 (0)   |
| Stent placement                        | 0 (0)   | 2 (2)   | 0 (0)   |
| Surgery                                | 1 (1)   | 0 (0)   | 2 (2)   |
| Toe amputation                         | 0 (0)   | 1 (1)   | 1 (1)   |
| Tooth extraction                       | 5 (5)   | 3 (3)   | 3 (3)   |
| Uterine dilation and curettage         | 1 (1)   | 0 (0)   | 0 (0)   |
| <b>Vascular disorders</b>              |         |         |         |
| Aortic stenosis                        | 1 (1)   | 0 (0)   | 0 (0)   |
| Arteriovenous fistula                  | 2 (1)   | 0 (0)   | 2 (2)   |
| Basilar artery occlusion               | 0 (0)   | 0 (0)   | 1 (1)   |
| Cerebrovascular accident               | 0 (0)   | 3 (3)   | 3 (2)   |
| Deep vein thrombosis                   | 0 (0)   | 1 (1)   | 0 (0)   |
| Haematoma                              | 2 (2)   | 1 (1)   | 0 (0)   |
| Haemorrhagic stroke                    | 0 (0)   | 0 (0)   | 1 (1)   |
| Hypertension                           | 28 (26) | 18 (16) | 27 (26) |
| Hypotension                            | 2 (2)   | 0 (0)   | 2 (2)   |
| Ischaemic stroke                       | 0 (0)   | 1 (1)   | 3 (3)   |
| Orthostatic hypotension                | 1 (1)   | 1 (1)   | 0 (0)   |
| Peripheral vascular disorder           | 2 (1)   | 2 (2)   | 1 (1)   |
| Poor peripheral circulation            | 0 (0)   | 0 (0)   | 1 (1)   |

|                            |       |       |       |
|----------------------------|-------|-------|-------|
| Raynaud's phenomenon       | 1 (1) | 0 (0) | 0 (0) |
| Transient ischaemic attack | 0 (0) | 1 (1) | 4 (4) |
| Venous insufficiency       | 0 (0) | 1 (1) | 2 (1) |
| Venous stenosis            | 1 (1) | 0 (0) | 1 (1) |

\*One year visit (If the 1 year visit was not completed or if it was completed prior to 365 days, then 365 days was used).

†Based on medical monitor using Medical Dictionary for Regulatory Activities coding.

## References

1. Yannuzzi NA, Klufas MA, Quach L, et al. Evaluation of Compounded Bevacizumab Prepared for Intravitreal Injection. *JAMA Ophthalmol*. 2014.
2. Hochberg Y. A sharper bonferroni procedure for multiple tests of significance. *Biometrika*. 1988;75(4):800-2.
3. Schafer J. Multiple imputation: a primer. *Statistical Methods in Medical Research*. 1999;8:3-15.
4. Spiegelman D, Hertzmark E. Easy SAS calculations for risk or prevalence ratios and differences. *Am J Epidemiol*. 2005;162(3):199-200.
5. Antiplatelet Trialists' Collaboration. Collaborative overview of randomised trials of antiplatelet therapy--I: Prevention of death, myocardial infarction, and stroke by prolonged antiplatelet therapy in various categories of patients. *BMJ*. 1994;308(6921):81-106.
